1 **A glycosaminoglycan extract from *Portunus***  
2 ***pelagicus* inhibits BACE1, the  $\beta$  secretase**  
3 **implicated in Alzheimer's disease.**  
4

5 Courtney J. Mycroft-West<sup>1</sup>, Lynsay C. Cooper<sup>1</sup>, Anthony J. Devlin<sup>1,3</sup>, Patricia Procter<sup>1</sup>, Scott Eric  
6 Guimond<sup>4,1</sup>, Marco Guerrini<sup>3</sup>, David G. Fernig<sup>2</sup>, Marcelo A. Lima<sup>1</sup>, Edwin A. Yates<sup>2,1</sup>, and Mark A.  
7 Skidmore<sup>1,2,4\*</sup>.

8 <sup>1</sup> *Molecular & Structural Biosciences, School of Life Sciences, Keele University, Huxley Building, Keele,*  
9 *Staffordshire, ST5 5BG, United Kingdom.*

10 <sup>2</sup> *School of Biological Sciences, University of Liverpool, Crown Street, Liverpool, L69 7ZB, United*  
11 *Kingdom.*

12 <sup>3</sup> *Istituto di Ricerche Chimiche e Biochimiche G. Ronzoni, Via G. Colombo 81, 20133 Milan, Italy.*

13 <sup>4</sup> *Institute for Science and Technology in Medicine, Keele University, Keele, Staffordshire, ST5 5BG,*  
14 *United Kingdom.*

15 \* Corresponding author: [m.a.skidmore@keele.ac.uk](mailto:m.a.skidmore@keele.ac.uk); Tel.: +44-(0)1782-733945  
16

17  
18  
19 **Abstract:** Therapeutic options for Alzheimer's disease, the most common form of dementia, are  
20 currently restricted to palliative treatments. The glycosaminoglycan heparin, widely used as a clinical  
21 anticoagulant, has previously been shown to inhibit the Alzheimer's disease-relevant  $\beta$ -secretase 1  
22 (BACE1). Despite this, the deployment of pharmaceutical heparin for the treatment of Alzheimer's  
23 disease is largely precluded by its potent anticoagulant activity. Furthermore, ongoing concerns  
24 regarding the use of mammalian sourced heparins, primarily due to prion diseases and religious  
25 beliefs, hinder the deployment of alternative heparin based therapeutics. A marine-derived, heparan  
26 sulphate-containing glycosaminoglycan extract isolated from the crab *Portunus pelagicus*, was  
27 identified to inhibit human BACE1 with comparable bioactivity to that of mammalian heparin ( $IC_{50} =$   
28  $1.85 \mu\text{g.mL}^{-1}$  ( $R^2 = 0.94$ ) and  $2.43 \mu\text{g.mL}^{-1}$  ( $R^2 = 0.93$ ), respectively) possessing highly attenuated  
29 anticoagulant activities. The results from several structural techniques suggest that the interactions  
30 between BACE1 and the extract from *P. pelagicus* are complex and distinct from those of heparin.

31  
32 **Keywords:** Alzheimer's disease; amyloid beta; BACE1; Beta-secretase; glycosaminoglycan; heparan  
33 sulphate; heparin; *Portunus pelagicus*.  
34  
35  
36  
37  
38

## 39 1. Introduction

40 Alzheimer's disease (AD), the most common form of dementia, is characterized by progressive  
41 neurodegeneration and cognitive decline [1]. The pathological hallmarks of AD include the  
42 accumulation of extracellular  $\beta$ -amyloid plaques and intraneuronal neurofibrillary tangles (NFTs) [2].  
43 Deposition and aggregation of toxic amyloid- $\beta$  proteins ( $A\beta$ ), the primary constituents of  $\beta$ -amyloid  
44 plaques, has been identified as one of the primary causative factors in the development of AD.  
45 Approximately 270 mutations within genes that are directly associated with  $A\beta$  production are currently  
46 linked to the early-onset development of AD [3].

47  
48 Amyloid- $\beta$  peptides ( $A\beta$ ) are produced through the sequential cleavage of the type 1  
49 transmembrane protein, amyloid precursor protein (APP). APP is initially cleaved by the aspartyl  
50 protease,  $\beta$ -site amyloid precursor protein cleaving enzyme 1 (BACE1), the primary neuronal  
51  $\beta$ -secretase [4], liberating a soluble N-terminal fragment (sAPP $\beta$ ) and a membrane bound C-terminal  
52 fragment ( $\beta$ -CTF or C99). The  $\beta$ -CTF/C99 fragment subsequently undergoes cleavage by  $\gamma$ -secretase  
53 within the transmembrane domain, releasing a 36-43 amino acid peptide ( $A\beta$ ) into the extracellular  
54 space; the most predominant species of  $A\beta$  being  $A\beta$ 40 [5,6]. An imbalance favouring the production of  
55  $A\beta$ 42 has been linked to the development of AD owing to a higher propensity to oligomerize and form  
56 amyloid fibrils, than the shorter  $A\beta$ 40 [7].

57  
58 As the rate-limiting step in  $A\beta$  production, inhibition of BACE1 has emerged as a key drug  
59 target for the therapeutic intervention of the progression of AD, in order to prevent the accumulation of  
60 toxic  $A\beta$  [8,9]. This is supported by the finding that BACE1 null transgenic mice models survive into  
61 adulthood with limited phenotypic abnormalities while exhibiting a reduction in brain  $A\beta$  levels  
62 [4,10–15]. Despite the therapeutic potential of BACE1 inhibition, the successful development of a  
63 clinically approved pharmaceuticals has proven a challenge due to the large substrate-binding cleft of  
64 BACE1, and unfavourable *in vivo* pharmaceutical properties of potent peptide inhibitors, for example  
65 oral bioavailability, half-life and blood brain barrier (BBB) penetration [9,16].

66  
67 Heparan sulphate (HS), and its highly sulfated analogue heparin (Hp), are members of the  
68 glycosaminoglycan (GAG) family of linear, anionic polysaccharides. They share a repeating  
69 disaccharide backbone consisting of a uronic acid (D-glucuronic acid; GlcA or L-iduronic acid; IdoA)  
70 and D-glucosamine, which can be variably sulphated or N-acetylated. HS is synthesised attached to a  
71 core protein forming HS proteoglycans (HSPGs), which have been identified colocalized with BACE1  
72 on cell surfaces, in the Golgi complex and in endosomes [17]. HSPGs were reported to endogenously  
73 regulate BACE1 activity *in vivo* through either a direct interaction with BACE1 and/or by sequestration  
74 of the substrate APP [17]. Addition of exogenous HS or heparin was also shown to inhibit BACE1  
75 activity *in vitro* and reduced the production of  $A\beta$  in cell culture (17–19). Mouse models treated with low  
76 molecular weight heparin (LMWH) exhibit a reduction in  $A\beta$  burden [20] and display improved cognition  
77 [21]. Furthermore, heparin oligosaccharides within the minimum size requirement for BACE1 inhibition  
78 [17,18], (<18-mers) possess the ability to cross the blood brain barrier (BBB) [22] and can be made  
79 orally bioavailable, depending on formulation and encapsulation methods [23]. Heparin analogues,  
80 therefore hold therapeutic potential as a treatment against AD, which may also offer an advantage over  
81 small molecule and peptide inhibitors of BACE1.

82

83 Heparin has been utilized clinically as a pharmaceutical anticoagulant for over a century due to  
84 its ability to perturb the coagulation cascade, principally through interactions with antithrombin III via  
85 the pentasaccharide sequence [-4- $\alpha$ -D-GlcNS,6S (1-4)  $\beta$ -D-GlcA (1-4)  $\alpha$ -D-GlcNS,3S,6S (1-4)  
86  $\alpha$ -L-IdoA2S (1-4)  $\alpha$ -D-GlcNS,6S. The side-effect of anticoagulation presents as an important  
87 consideration when determining the potential of a heparin-based pharmaceutical for the treatment of  
88 AD. It has been previously determined that the anticoagulation potential of heparin can be highly  
89 attenuated by chemical modifications, while retaining the favourable ability to inhibit BACE1 [17–19].  
90 Polysaccharides in which the 6-O-sulfate had been chemically removed were reported to have  
91 attenuated BACE1 activity [17,18] although this correlates with an augmented rate of fibril formation  
92 [24].

93 Polysaccharides analogous to GAGs have been isolated from a number of marine invertebrate  
94 species that offer rich structural diversity and display highly attenuated anticoagulant activities  
95 compared to mammalian counterparts [25–33]. The largely unexplored chemical diversity of marine  
96 derived GAGs, provides a vast reservoir for the discovery of novel bioactive compounds, some of  
97 which have been identified to exhibit antiviral [34,35], anti-parasitic [36,37], anti-inflammatory [38,39],  
98 anti-metastasis [30-41], anti-diabetic [42], anti-thrombotic [32] and neurite outgrowth-promoting  
99 activities [43]. Also, these compounds may be obtained from waste material, which makes their  
100 exploitation both economical and environmental appealing. Here, a GAG extract isolated from the crab  
101 *Portunus pelagicus*, has been found to possess attenuated anticoagulant activity, whilst potently  
102 inhibiting the AD relevant  $\beta$ -secretase, BACE1 *in vitro*.

103

104

105

## 106 2. Results

### 107 2.1. Isolation and characterisation of a glycosaminoglycan extract from the crab *Portunus* 108 *pelagicus*.

109 A glycosaminoglycan extract isolated from the crab *Portunus pelagicus* via proteolysis was  
110 fractionated by DEAE-Sephacel anion-exchange chromatography utilizing a stepwise sodium chloride  
111 gradient. The eluent at 1 M NaCl (fraction 5; designated *P. pelagicus* F5) was observed to have similar  
112 electrophoretic mobility in 1,3-diaminopropane buffer (pH 9.0) to mammalian HS/Hp, with no bands  
113 observed corresponding to monosulphated chondroitin sulphate (CSA/CSC), disulphated chondroitin  
114 sulphate (CSD) or dermatan sulphate (DS) (Figure 1).

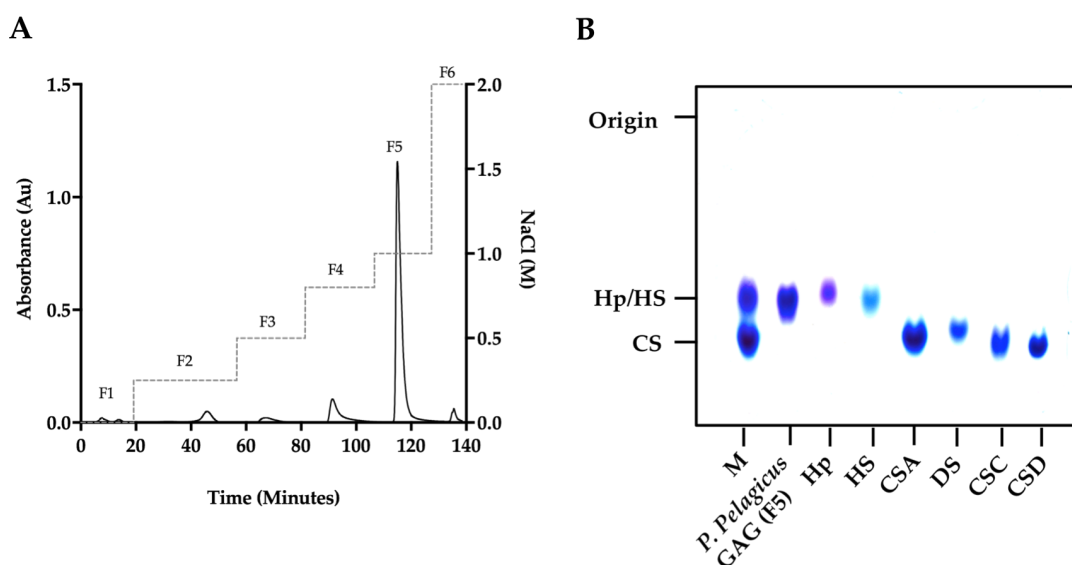

115

116 **Figure 1: (A)** DEAE purification of *P. pelagicus* crude glycosaminoglycan. Fractions 1-6 (F1-6;  $\lambda_{Abs} = 232$  nm,  
117 solid line) were eluted using a stepwise NaCl gradient with HPAEC (dashed line). **(B)** Agarose gel electrophoresis  
118 of *P. pelagicus* F5. The electrophoretic mobility of *P. pelagicus* F5 was compared to that of *bone fide*  
119 glycosaminoglycan standards, heparin (Hp;), heparan sulphate (HS;), dermatan sulphate (DS;) and chondroitin  
120 sulphate A, C and D (CSA, CSC and CSD, respectively;). M: CSA, Hp and HS mixture.

121

122 In order to corroborate the Hp/HS like structural characteristics of *P. pelagicus* F5, the ATR-FTIR  
123 spectra has been compared with that of Hp. Both *P. pelagicus* F5 and Hp were shown to share similar  
124 spectral features, for instance bands at 1230, 1430 and 1635  $\text{cm}^{-1}$ , which are associated with S=O  
125 stretches, symmetric carbonyl stretching and asymmetric stretches respectively, indicative of common  
126 structural motifs. An additional peak and a peak shoulder located at  $\sim 1750$  and  $\sim 1370$   $\text{cm}^{-1}$ , were  
127 observed in *P. pelagicus* F5, but absent in Hp. The peak shoulder at  $\sim 1370$   $\text{cm}^{-1}$  is indicative of a Hp  
128 and CS mixture. The differences observed between the spectra of *P. pelagicus* F5 and Hp in the  
129 variable OH region ( $> 3000$   $\text{cm}^{-1}$ ) are likely to be associated with changeable moisture levels present  
130 during sample acquisition (Figure 2A) as opposed to underlying differences within glycan structure  
131 [44].

132

133 Post acquisition, the ATR-FTIR spectrum of *P. pelagicus* F5 was interrogated against a library  
134 of known GAGs comprising; 185 Hps, 31 HSs, 44 CSs & DSs, 11 hyaluronic acids (HAs) and 6

135 oversulfated chondroitin sulphates (OSCSs) using principal component analysis (PCA) [44]. Principal  
136 component 1 (PC1), which covers 57% of the total variance, indicates that *P. pelagicus* F5 locates  
137 within the region containing mammalian Hp/HS. Through comparison of PC1 and PC2, comprising >  
138 70% of the total variance, *P. pelagicus* F5 lies towards the CS region, a location previously identified  
139 with Hps containing small amounts of CS/DS [44], analogous to crude, pharmaceutical Hp.

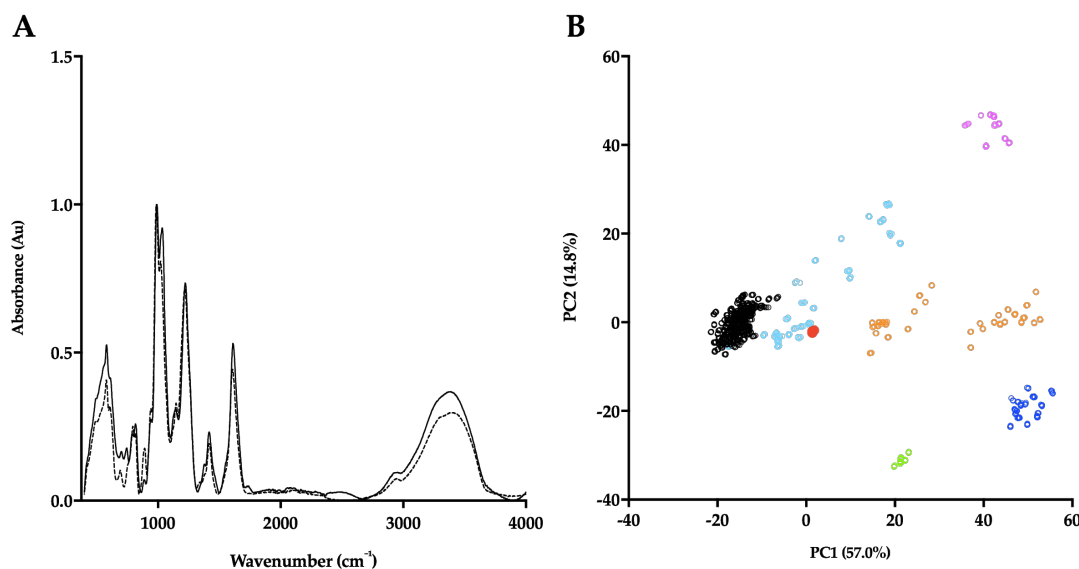

140

141 **Figure 2: (A)** ATR-FTIR spectra of porcine mucosal Hp (dashed line) and *P. pelagicus* F5; (solid line), n = 5.  
142 **(B)** Principal component analysis (PCA) Score Plot for PC1 vs PC2 of *P. pelagicus* F5 against a *bone fide* GAG  
143 library. Hp, black; HS, cyan; CS, orange; DS, blue; hyaluronic acid (HA), magenta; oversulphated-CS, light  
144 green and *P. pelagicus* F5, red (filled circle).

145

146 *P. pelagicus* F5 was subsequently subjected to exhaustive enzymatic cleavage with  
147 *Flavobacterium heparinum* lyases I, II and III. The digest products from *P. pelagicus* F5 (Figure 4,  
148 Table 1) and a Hp control (Figure 3, Table 1) were analyzed using strong anion-exchange  
149 chromatography and the retention times compared to those of the eight common  $\Delta$ -disaccharide  
150 standards present within both Hp and HS [45].

151

152 The digest products detected for Hp were in agreement with a typical mammalian Hp  
153 disaccharide profile [45], with 51.5% of the total products attributable to the trisulphated,  
154  $\Delta$ -UA(2S)-GlcNS(6S) and 22.9% to  $\Delta$ -UA-GlcNS(6S). A minimal proportion of mono or unsulphated  
155 disaccharides, accounting for 12.3%, and 4.3% respectively, were also observed for Hp. In  
156 comparison, a more disperse sulphation profile was observed for *P. pelagicus* F5 than Hp (Table 1),  
157 with a comparatively lower proportion of trisulphated disaccharides, 23.1%. The *P. pelagicus* F5  
158 contained 24.4% monosulphated disaccharides, of which 16.5% was accounted for by  
159  $\Delta$ -UA(2S)-GlcNAc. A higher proportion of  $\Delta$ -UA(2S)-GlcNS (23.5%), was also detected in *P. pelagicus*  
160 F5, than Hp (5.9%), indicating that the compound displays distinct structural characteristics. Such  
161 features also contrast with that of HS, where ~50-70% of disaccharides are comprised of  
162  $\Delta$ -UA-GlcNAc/ $\Delta$ -UA-GlcNS [25,45–47]. Also, *P. pelagicus* F5 presents a significant higher proportion  
163 of trisulphated disaccharides than commonly present in mammalian HS, a typical marker of more  
164 heparin-like structures.

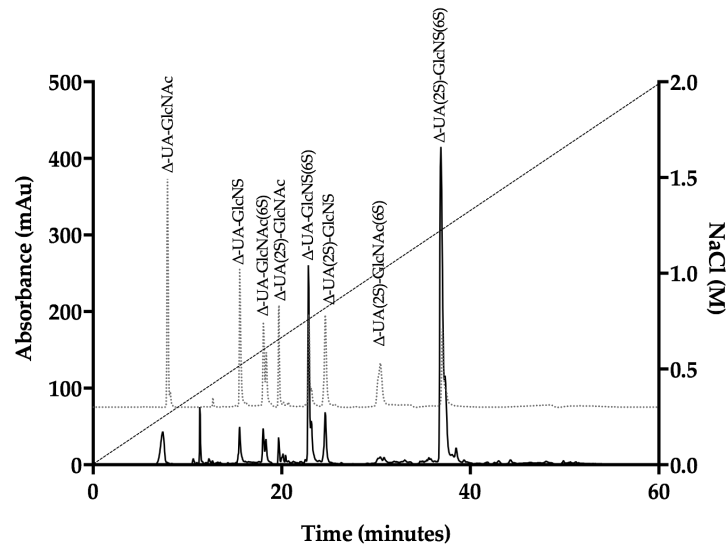

165

166 **Figure 3:** UV-SAX HPLC disaccharide composition analysis was performed on the bacterial lyase digest of Hp  
167 ( $\lambda_{\text{Abs}} = 232 \text{ nm}$ ) eluting with a linear gradient of 0 - 2 M NaCl (dashed line). Eluted  $\Delta$ -disaccharides were  
168 referenced against the eight common standards present within Hp and HS (light grey, dotted line).

169

170

171

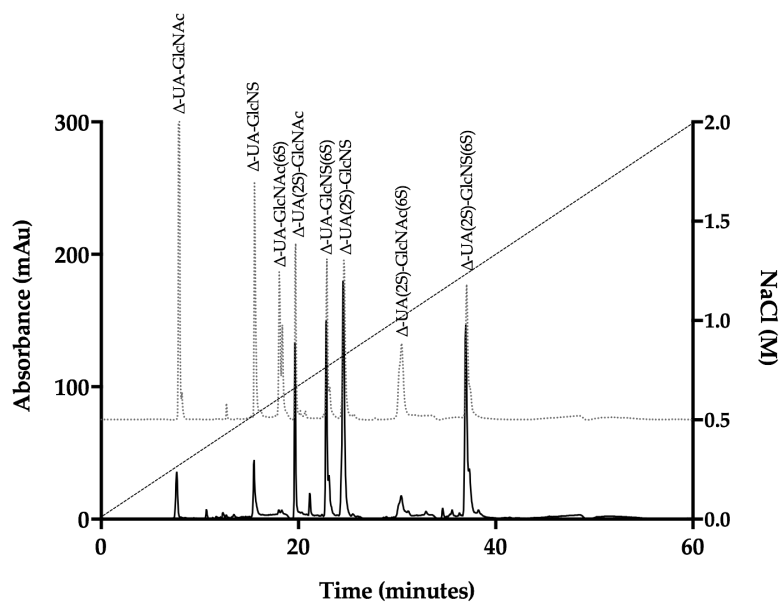

172

173 **Figure 4:** UV-SAX HPLC disaccharide composition analysis was performed on the bacterial lyase digest of the  
174 *P. pelagicus* F5 ( $\lambda_{\text{Abs}} = 232 \text{ nm}$ ) eluting with a linear gradient of 0 - 2 M NaCl (dashed line). Eluted  $\Delta$ -disaccharides  
175 were referenced against the eight common standards present within Hp and HS (light grey, dotted line).

176

**Table 1: Corrected disaccharide composition analysis of *P. pelagicus* F5 and Hp.**

| $\Delta$ -Disaccharide      | <i>P. pelagicus</i> F5 (%) | Hp (%) |
|-----------------------------|----------------------------|--------|
| $\Delta$ -UA-GlcNAc         | 2.8                        | 4.3    |
| $\Delta$ -UA-GlcNS          | 5.6                        | 4.2    |
| $\Delta$ -UA-GlcNAc(6S)     | 2.3                        | 5.0    |
| $\Delta$ -UA(2S)-GlcNAc     | 16.5                       | 3.1    |
| $\Delta$ -UA-GlcNS(6S)      | 20.2                       | 22.9   |
| $\Delta$ -UA(2S)-GlcNS      | 23.5                       | 5.9    |
| $\Delta$ -UA(2S)-GlcNAc(6S) | 6.0                        | 3.1    |
| $\Delta$ -UAs(2S)-GlcNS(6S) | 23.1                       | 51.5   |

177

178 Proton and Heteronuclear Single-Quantum Correlation (HSQC) NMR was employed to confirm the  
 179 GAGs composition of *P. pelagicus* F5.  $^1\text{H}$  NMR can indicate the major signals associated with HS as  
 180 well as signals that arise from galactosaminoglycans such as CS. The presence of both (Figure 5A  
 181 insert) is easily identified by the two N-acetyl signals at 2.02 ppm (CS) and 2.04 ppm (HS).  $^1\text{H}$ - $^{13}\text{C}$   
 182 HSQC NMR (Figure 5B) has been used to resolve overlapping signals and saccharide composition  
 183 estimates using peak volume integration. Integration of N-acetyl signals revealed that the extract is  
 184 composed of approximately 60% HS and 40% CS. The combined integration of the N-acetyl and A2  
 185 signals from the HS showed that *P. pelagicus* F5 possesses a high NS content of approximately 76%,  
 186 which supports the HPLC-based empirical disaccharide analysis (Figure 4 and Table 1). Together,  
 187 these data establish that the HS of *P. pelagicus* F5 is considerably more sulfated (Table 1) than that  
 188 commonly extracted from mammalian sources [45]. With regard to the CS element of *P. pelagicus* F5,  
 189 signals typical of the CS backbone are present although sulfation is generally low, with galactosamine  
 190 6-O-sulfation occurring in approximately 35% of all CS residues. The lack of non-overlapping signal for  
 191 galactosamine 4-O-sulfation indicates all but negligible levels of such a modification are present within  
 192 the CS component.

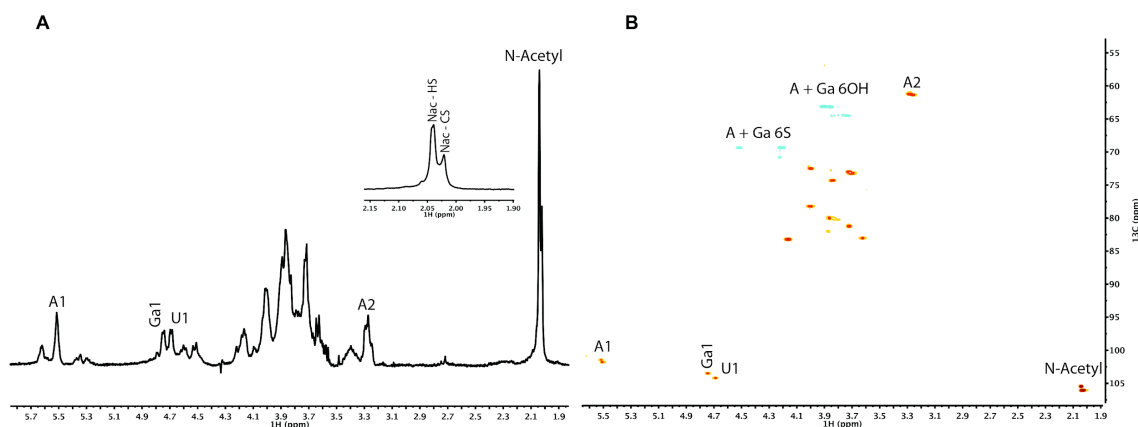

193

194 **Figure 5: (A)**  $^1\text{H}$  and **(B)**  $^1\text{H}$ - $^{13}\text{C}$  HSQC NMR spectra of *P. pelagicus* F5. Major signals associated with HS and  
195 CS are indicated. Spectral integration was performed on the HSQC using labeled signals. Key: glucosamine, A;  
196 uronic acid, U ; N-Acetyl, Nac and galactosamine, Ga.

## 197 **2.2 *P. pelagicus* F5 inhibits the Alzheimer's Disease $\beta$ -secretase 1.**

198 *P. pelagicus* F5 was assayed for inhibitory potential against BACE1, utilizing a fluorogenic peptide  
199 cleavage FRET assay, based upon the APP Swedish mutation. Reactions were performed at pH 4.0,  
200 within the optimal pH range for BACE1 activity (Figure 6). A maximal level of BACE1 inhibition of  
201  $90.7\% \pm 2.9$  ( $n = 3$ ) was observed in the presence of  $5 \mu\text{g}.\text{mL}^{-1}$  *P. pelagicus* F5, with an  $\text{IC}_{50}$  value of  $1.9$   
202  $\mu\text{g}.\text{mL}^{-1}$  ( $R^2 = 0.94$ ). This was comparable to the activity of Hp, which exhibited a maximal level of  
203 BACE1 inhibition of  $92.5\% \pm 1.5$  ( $n = 3$ ) at  $5 \mu\text{g}.\text{mL}^{-1}$ , with an  $\text{IC}_{50}$  of  $2.4 \mu\text{g}.\text{mL}^{-1}$  ( $R^2 = 0.93$ ).

204 In the presence of low concentrations of Hp, an increase in BACE1 activity was observed (Figure  
205 6A-B), with maximal activation occurring at  $625 \text{ ng}.\text{mL}^{-1}$  ( $57.5\% \pm 3.7$ ,  $n = 3$ ). The BACE1 utilised in this  
206 study consisted of the zymogen form ( $\text{Thr}^{22}\text{-Thr}^{457}$ ), containing the prodomain sequence. This is in  
207 accord with previous reports that demonstrate low concentrations ( $\sim 1 \mu\text{g}.\text{mL}^{-1}$ ) of heparin can stimulate  
208 proBACE1 activity [48,49]. A maximum increase in BACE1 activity was also detected in the presence  
209 of  $625 \text{ ng}.\text{mL}^{-1}$  of *P. pelagicus* F5 ( $38.5\% \pm 1.4$ ,  $n = 3$ ), although significantly diminished promotion was  
210 displayed compared to the same concentration of Hp ( $57.5\% \pm 3.7$ ,  $n = 3$ );  $t(4) = 4.859$ ,  $p = 0.0083$ .  
211 This indicates that although *P. pelagicus* F5 exhibits stimulatory activity, it is significantly less than that  
212 of Hp. The percent activity level returned to that of the negative control value at concentrations lower  
213 than  $312.5 \text{ ng}.\text{mL}^{-1}$ , indicating that both inhibitory and stimulatory effects are dose dependent. For both  
214 Hp and *P. pelagicus* F5, BACE1 promotion was followed by enzyme inhibition, as previously reported  
215 (Figure 6B-C;[49]. The rate of BACE1 activity between 60 - 90 minutes was significantly different from  
216 controls lacking either Hp ( $n = 3$ -6;  $t(4) = 7$ ,  $p < 0.003$ ), or *P. pelagicus* F5 ( $n = 3$ -6;  $t(6) = 7$ ,  $p < 0.004$ ) at  
217  $625 \text{ ng}.\text{mL}^{-1}$ , indicating inhibition was not due to substrate limitations.

218

219



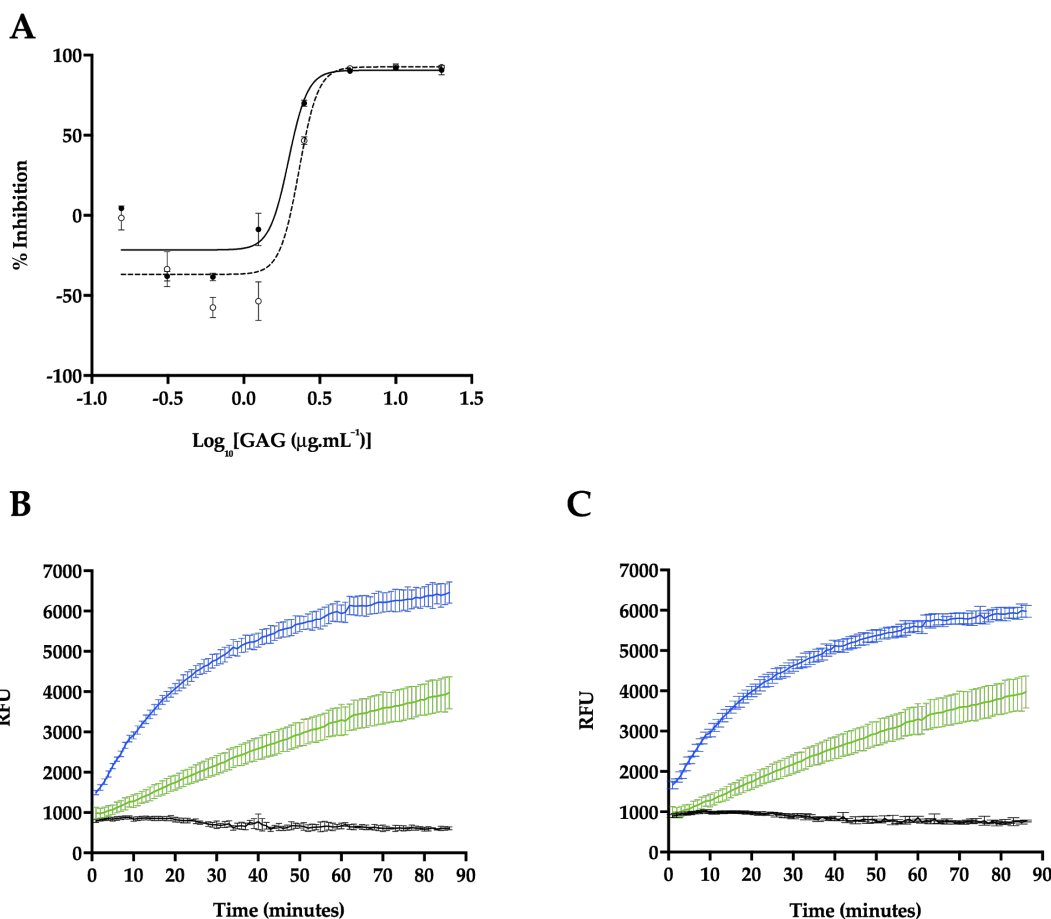

220

221 **Figure 6: Inhibition of human BACE1 by Hp or *P. pelagicus* F5.** (A) Dose response of Hp (dashed line, open

222 circles) or *P. pelagicus* F5 (solid line, filled circles) as determined using FRET. *P. pelagicus* F5, IC<sub>50</sub> = 1.9 µg.mL<sup>-1</sup>

223 (R<sup>2</sup> = 0.94); Hp, IC<sub>50</sub> = 2.4 µg.mL<sup>-1</sup> (R<sup>2</sup> = 0.93). (B) Time course activation or inhibition of BACE1 by 5 µg.mL<sup>-1</sup>

224 (black) or 625 ng.mL<sup>-1</sup> (blue) Hp, compared to water control (green). (C) The same as (B) for *P. pelagicus* F5.

225

### 226 **2.3 Heparin binding induces a conformational change in the Alzheimer's disease beta** 227 **secretase, BACE1.**

228 Hp binding has been proposed to occur at a location close to the active site of BACE1 [17],  
229 possibly within or adjacent to the prodomain sequence [48]. In-light of the contrasting and  
230 concentration dependant BACE1:GAG bioactivities, the ability of Hp and *P. pelagicus* F5 to induce  
231 structural changes in BACE1 has been investigated utilising circular dichroism (CD) spectroscopy at a  
232 range of w/w ratios; this also negates the intrinsic effect of the significant polydispersity for this class of  
233 biomolecules.

234

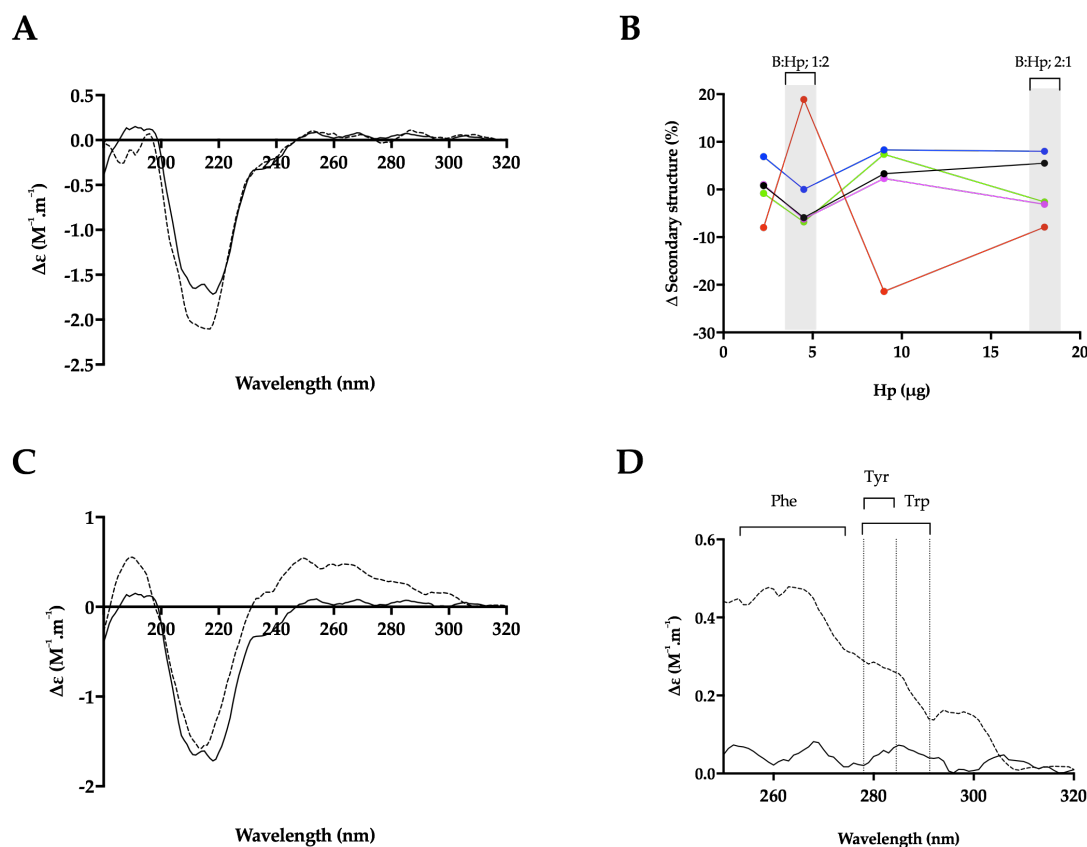

235

236 **Figure 7:** The structural change of BACE1 observed in the presence of Hp by circular dichroism (CD)  
 237 spectroscopy. **(A)** CD spectra of BACE1 alone (solid line) or with Hp at a ratio of 1:2 (w/w; dashed line; B:Hp 1:2);  
 238 **(B)**  $\Delta$  secondary structure (%) of BACE1 upon the addition of increasing amounts of Hp;  $\alpha$ -helix (black),  
 239 antiparallel (red), parallel (blue), turn (magenta) and others (green) [50]. % structural change of B:Hp; 1:2 or 2:1  
 240 (w/w) ratio are highlighted in grey. **(C)** CD spectra of BACE1 alone (solid line) with Hp (dashed line) at a ratio of  
 241 2:1 w/w **(D)** Near-UV CD spectra of (C); respective absorption regions of aromatic amino acids are indicated [51].  
 242 Spectra were recorded in 50 mM sodium acetate buffer pH 4.0 in all panels.

243

244 The CD spectra of BACE1 at pH 4.0 has previously been shown to contain a greater proportion  
 245 of  $\beta$ -sheet and reduced  $\alpha$ -helical content, compared to spectra obtained at pH 7.4, indicating that at an  
 246 acidic pH, where BACE1 is most active, a conformational change can be observed by CD [52].  
 247 Consistent with this, the CD spectra of BACE1 in 50 mM sodium acetate buffer pH 4.0 (Figure 7 and 8),  
 248 featured a positive peak at wavelengths below 200 nm, which can be attributed to a sum of  $\alpha$ -helical  
 249 and  $\beta$ - sheet structures [53]. The broad, negative band observed between wavelengths 250 - 200 nm,  
 250 contains a peak at  $\lambda = 218$  nm  $\sim$  208 nm, commonly associated with antiparallel  $\beta$ -sheets and  $\alpha$ -helical  
 251 structures, respectively [53] (Figure 7). The CD spectra of BACE1 at pH 4.0 can be estimated to have  
 252 secondary structural composition of 9%  $\alpha$ -helix, 31% antiparallel  $\beta$ -sheet, 16% turn and 44% other  
 253 (NRMSD <0.1) when fitted against a library of representative proteins using BeStSel [50]. This was in  
 254 close agreement with the BestSel secondary structure prediction based on x-ray crystallography of  
 255 BACE1 at pH 4.0 (PDB accession no 2ZHS, [54] of of 7%  $\alpha$ -helix, 30% antiparallel, 4% parallel, 12%  
 256 turn and 47% other. Deviations between secondary structure predictions may be accounted for by  
 257 subtle differences present within the BACE1 primary sequences.

258 In the presence of a BACE1:Hp (B:Hp), ratio of 1:2 (w/w) where maximal inhibition was  
259 observed in FRET assays, the CD spectra of BACE1 exhibited increased negative ellipticity below  $\lambda =$   
260 222 nm, resulting in an estimated increase in  $\alpha$ -helix (+ 6 %) and a reduction in antiparallel  $\beta$ -sheet (- 8  
261 %) (NRMSD <0.1) [50] (Figure 7D). In comparison to Hp, BACE1 in the presence of *P. pelagicus* F5  
262 (B:F5) at the same ratio (1:2; w/w), exhibited a slight increase in positive ellipticity between  $\lambda = 222 -$   
263 200 nm and decreases at  $\lambda < 200$  nm, resulting in an estimated change in  $\alpha$ -helical of + 1 %  
264 accompanied by a decrease in antiparallel  $\beta$ -sheet of 8 % (Figure 8D). This is in contrast to CD studies  
265 in the presence of peptide inhibitors, which did not reveal a secondary structural change in BACE1 [52].

266 The conformational change of BACE1 upon binding to Hp and *P. pelagicus* F5 was assessed  
267 over a range of ratios (Figure 7D and 8D). At a B:Hp ratio of 2:1 (w/w), a change in the characteristics  
268 of the CD spectrum of BACE1 was observed in the far-UV region ( $\lambda < 250$  nm; Figure 7A) that was  
269 identified as a reduction in  $\alpha$ -helix by 6% and an 19% increase in antiparallel  $\beta$ -sheet structures  
270 (NRMSD <0.1) [50]. In addition, an increase in positive ellipticity was observed in the near-UV region  
271 (250-300 nm; Figure 7B) following the addition of Hp, which may be attributed to a change in the  
272 tertiary structure of BACE1 involving aromatic amino acids [55,56] . In contrast, B:F5 at the same ratio  
273 of 2:1 (w/w), exhibited a decrease in ellipticity in the near- and far- UV region ( $\lambda < 300$  nm;  
274 supplementary data).

275 The increase in positive ellipticity observed in the CD spectra of BACE1 in the near-UV region at  
276 B:Hp ratio of 2:1 (w/w), was also observed at a 1:1 (w/w) ratio of B:F5 (Figure 8B). The secondary  
277 structural change in the far-UV CD spectrum of BACE1 at a B:F5 ratio of 1:1 (w/w) between  $\lambda = 250 -$   
278 190 nm corresponded to a decrease in  $\alpha$ -helix by 8% and an increase in antiparallel  $\beta$ -sheet structures  
279 by 15%.

280

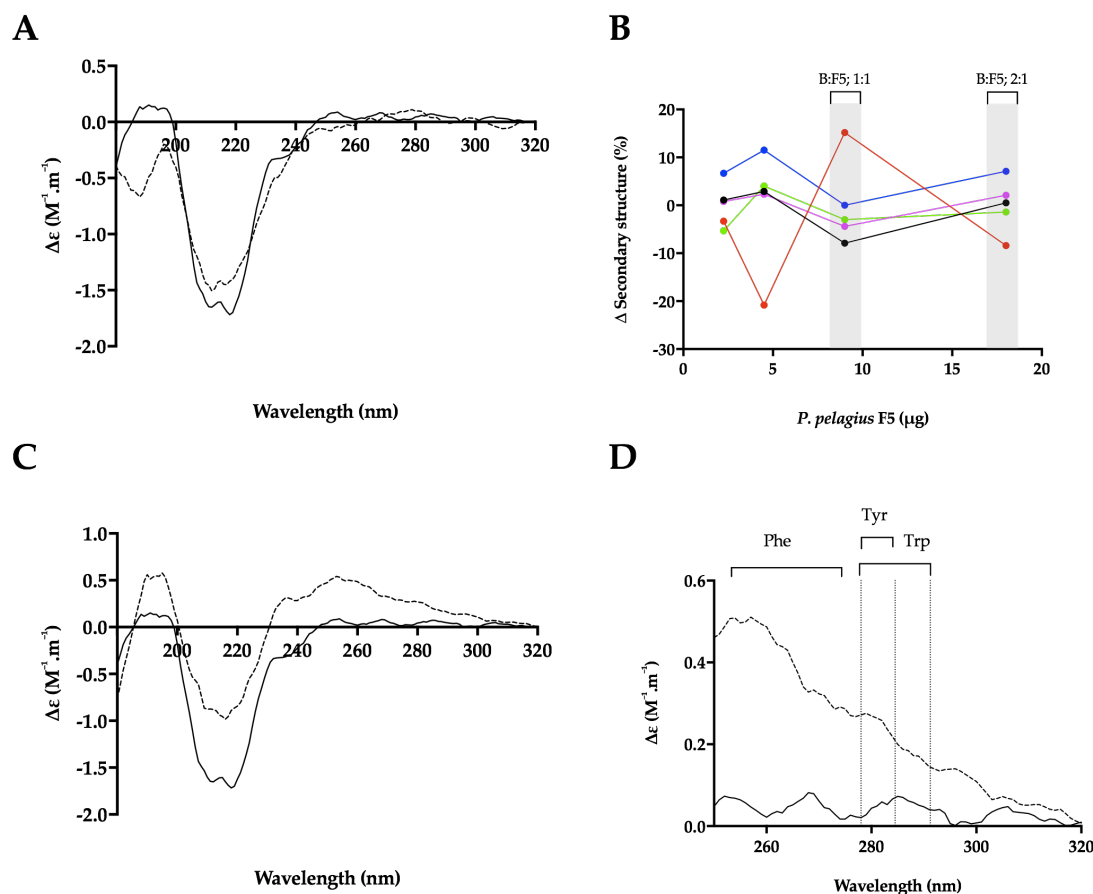

281

282 **Figure 8:** The structural change of BACE1 observed in the presence of *P. pelagicus* F5 by CD spectroscopy. **(A)**  
 283 CD spectra of BACE1 alone (solid line) with *P. pelagicus* F5 (dashed line; ratio of 1:2 w/w; B:F5); **(B)**  $\Delta$  secondary  
 284 structure (%) of BACE1 upon the addition of increasing amounts of *P. pelagicus* F5;  $\alpha$ -helix (black), antiparallel  
 285 (red), parallel (blue), turn (magenta) and others (green) [50]. % structural change of B:F5; 1:2 or 1:1 ratio are  
 286 highlighted in grey. **(C)** CD spectra of BACE1 alone (solid line) or with *P. pelagicus* F5 (dashed line; ratio of 1:1  
 287 w/w); **(D)** Near-UV CD spectra of (C); respective absorption regions of aromatic amino acids are indicated [51].  
 288 Spectra were recorded in 50 mM sodium acetate buffer pH 4.0 in all panels.

289

#### 290 **2.4 Heparin and *P. pelagicus* F5 destabilise the Alzheimer's BACE1.**

291 Both Hp and *P. pelagicus* F5 were shown to induce a conformational change in BACE1, in contrast to  
 292 previous CD studies in the presence of peptide inhibitors [52]. Therefore, to explore whether the  
 293 binding of Hp or *P. pelagicus* F5 alters the stability of BACE1, in a mechanism similar to known  
 294 inhibitors, differential scanning fluorimetry (DSF) was employed to monitor the change in thermal  
 295 stability. Previously identified BACE1 inhibitors have been shown to stabilize BACE1, exemplified by  
 296 an increase in  $T_M$  values obtained through DSF measurements [57]. In the presence of a BACE1:Hp  
 297 ratio of 1:2, a decrease in the  $T_M$  of BACE1 by 11°C was observed. In the presence of a BACE1:*P.*  
 298 *pelagicus* F5 of 1:2 a decrease in the  $T_M$  of BACE1 was also observed by 10°C. The change in  $T_M$  of  
 299 BACE1 induced by binding of either Hp or *P. pelagicus* F5 was not significantly different, ( $p = 0.1161$   $t =$   
 300  $2$   $df = 4$ ). The destabilisation of BACE1 in the presence of both Hp and *P. pelagicus* F5 was found to be  
 301 concentration dependent.

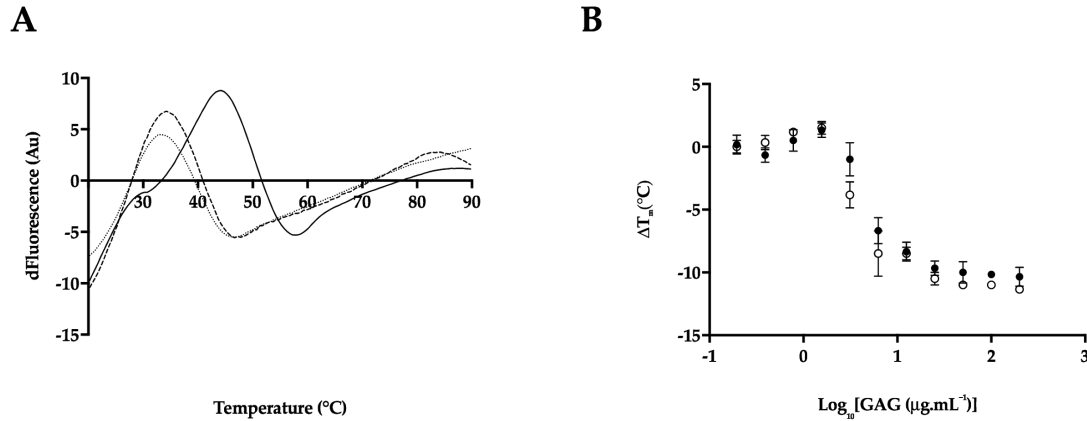

302

303 **Figure 9: (A)** First differential of the DSF thermal stability profile of BACE1 alone (1 µg; solid line), and with Hp (2  
 304 µg; dotted line) or *P. pelagicus* F5 (2 µg; dashed line), in 50 mM sodium acetate, pH 4.0; **(B)**  $\Delta T_m$  of BACE1  
 305 with increasing [Hp] or [*P. pelagicus* F5] (open or closed circles, respectively).

306

### 307 2.5 Attenuated anticoagulant activities of the *P. pelagicus* glycosaminoglycan extract.

308 An important consideration when determining the therapeutic potential of a heparin-like polysaccharide  
 309 against AD is the likely side effect of anticoagulation. Therefore, the prothrombin time (PT) and  
 310 activated partial thromboplastin time (aPTT) were measured *P. pelagicus* F5 compared to Hp (193  
 311 IU.mg<sup>-1</sup>), in order to determine the overall effect on the extrinsic and intrinsic coagulation pathways,  
 312 respectively (both assays also include the common coagulation pathway). In comparison to Hp, *P.*  
 313 *pelagicus* F5 exhibited reduced anticoagulant activity in both the PT (Figure 9A; EC<sub>50</sub> of 420.2 µg.mL<sup>-1</sup>  
 314 compared to 19.53 µg.mL<sup>-1</sup>, respectively) and aPTT (Figure 9B; EC<sub>50</sub> 43.21 µg.mL<sup>-1</sup> compared to 1.66  
 315 µg.mL<sup>-1</sup>, respectively) coagulation assays. Both results show that the extract presents a negligible  
 316 anticoagulant activity.

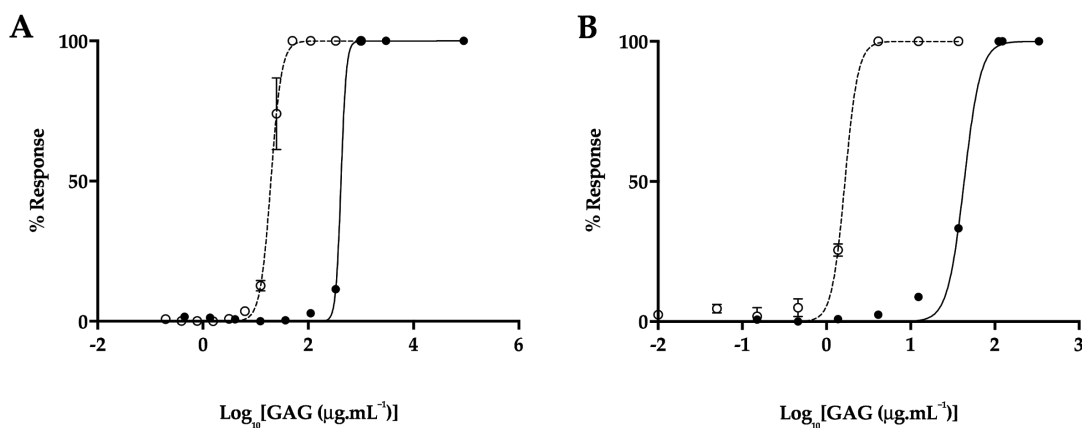

317

318 **Figure 10: (A)** Prothrombin time (PT) and **(B)** activated partial thromboplastin time (aPTT) inhibitory response  
 319 ( $\bar{x}\%$ ,  $\pm$  SD, n=3) for Hp (open circle, dashed line) and *P. pelagicus* F5 (closed circle, solid line);. **PT:** Hp EC<sub>50</sub> =  
 320 19.53 µg.mL<sup>-1</sup>; *P. pelagicus* F5, EC<sub>50</sub> = 420.2 µg.mL<sup>-1</sup>; **aPTT:** Hp EC<sub>50</sub> = 1.66 µg.mL<sup>-1</sup>; *P. pelagicus* F5, EC<sub>50</sub>  
 321 = 43.21 µg.mL<sup>-1</sup>.

322

### 323 3. Discussion

324 The glycosaminoglycan extract isolated from *P. pelagicus* was observed to possess similar  
325 electrophoretic behavior to mammalian HS and Hp, with no bands identified corresponding to CS or DS  
326 standards. In contrast, the FTIR and HSQC analyses of *P. pelagicus* F5 identified regions  
327 corresponding to both HS and CS saccharides within the extract. PCA analysis of the FTIR spectra  
328 revealed *P. pelagicus* F5 contained features associated with both HS/Hp and CS/DS, which are typical  
329 of crude heparin preparations [44]. This was confirmed by HSQC NMR which identified N-acetyl peaks  
330 associated with both galactosamine (CS) and glucosamine (HS). The absence of an IdoA signal from  
331 the NMR spectra suggests *P. pelagicus* F5 resembles HS and CS more closely than DS/Hep [58,59].  
332 Peaks corresponding to Gal-6S and 6-OH were identified by NMR analysis, with no detectable  
333 4-O-sulfation, indicating that the CS component of *P. pelagicus* F5 resembles CSC saccharides. The  
334 HS component possesses > 70% N-sulfated moieties, which is greater than mammalian HSs  
335 published previously, but is not as heavily N-sulfated as mammalian heparins. An intermediate  
336 proportion of trisulfated  $\Delta$ -disaccharides were also identified post bacterial lyase digestion in *P.*  
337 *pelagicus* F5, when compared to mammalian HS and Hp samples. Furthermore, the *P. pelagicus* F5  
338 extract contained a low proportion of  $\Delta$ -UA-GlcNAc/  $\Delta$ -UA-GlcNS, which is typical of more heparin-like  
339 structures. This suggests that the HS/Hp component of *P. pelagicus* F5 consists of a hybrid structure  
340 lacking the domain structure of HS and the highly sulfated regions of Hp.

341  
342 The absence of a band migrating in a similar manner to that of CS when *P. pelagicus* F5 was  
343 subjected to agarose gel electrophoresis suggests that the polysaccharide is not a mixture of HS and  
344 CS chains. The simplicity of the signals in the HSQC spectrum suggests either two separate  
345 populations, or two distinct domains, while the former is not consistent with the agarose gel  
346 electropherogram mentioned previously. The PCA of the FTIR spectra is also in agreement with the  
347 presence of discrete, rather than mixed HS/CS sequences. The precise nature of the arrangement of  
348 these stretches remains unknown, although it is well documented that marine-derived GAGs harbour  
349 significant and unusual structural features, when compared to those present within their mammalian  
350 counterparts [25,26,38,60–69]. Studies to resolve this technically demanding question are currently in  
351 progress.

352  
353 The *P. pelagicus* F5 extract was found to possess significant inhibitory potential against  
354 human BACE1, in a manner akin to that of mammalian Hp, as demonstrated by comparable IC<sub>50</sub>  
355 concentrations determined via FRET. The ability of *P. pelagicus* F5 to promote BACE1 bioactivity at  
356 lower concentrations, owing to the presence of the BACE1 pro-domain [48,49] appears to be at a  
357 diminished level compared to mammalian Hp, suggesting differences between these GAGs and the  
358 nature of their interactions with human BACE1. This was exemplified when the secondary structural  
359 changes in BACE1 (evident from CD) in the presence of Hp or *P. pelagicus* F5 were examined.

360  
361 BACE1 has previously been observed to adopt a unique secondary structure at pH 4.0, where  
362 catalytic activity is increased, resulting in a predicted increase in beta-sheet and a reduction in  
363 alpha-helical structures [52]. When the changes in the secondary structure (evident from CD) of  
364 BACE1 in the presence of high concentrations of Hp (BACE1:Hp ratio of 1:2) was examined a shift  
365 towards the structural features observed for BACE1 alone at pH 7.4. was observed (increase in

366 alpha-helical and reduction in beta sheets). At high concentrations (B:F5 ratio of 1:2), the *P. pelagicus*  
367 F5 extract induced similar, but not identical, changes to the secondary structure of human BACE1,  
368 when compared to those of Hp at the same ratio.

369 In contrast, the CD spectra observed for B:Hp complexes under conditions that facilitate  
370 BACE1 promotion (i.e. low Hp concentrations), demonstrated evidence of an interaction that involves  
371 the aromatic amino acids (near UV CD). Tyr-71 is located within the BACE1 flap that has previously  
372 been identified to change conformation between the flap-open and flap-closed states [70] .  
373 Unfortunately, due to the location of the aromatic residues on the surface of the protein, it is not  
374 possible to conclude definitely whether interaction(s) of Hp-based inhibitors with human BACE1 occur  
375 at, or near to, the active site. This interpretation is consistent with the previous reports that a  
376 conformational change in BACE1 may occur upon heparin binding, which would be required to allow  
377 access into the active site [48] . In addition, the increase in BACE1 activity by heparin has been  
378 shown to be followed by BACE1 inhibition [49], which may suggest this arrangement is required to  
379 allow access to the active site. The results also support the work by Scholefield *et al.* [17] who  
380 showed that the mode of Hp inhibition is non-competitive, and can prevent access of the substrate.

381 At lower GAG concentrations, differences in BACE1 secondary structure were observed  
382 between the B:Hp and B:F5 complexes in the CD spectra, although a similar change in the near UV CD  
383 spectra of BACE1 was observed with increased amounts of *P. pelagicus* F5. This may be accounted  
384 for by the reduced potency of *P. pelagicus* F5 with regard to activating BACE1, or indicative of an  
385 alternative interaction. The conformational change induced in the near-UV CD spectra of BACE1 is  
386 solely the result of the HS/Hp-like component of the *P. pelagicus* F5 extract. CS has previously been  
387 shown to possess diminished BACE1 promotion activity compared to Hp/HS [48].

388  
389 From a mechanistic standpoint, the decrease in the  $T_m$ s observed using DSF for both the  
390 human BACE1 protein in the presence of either Hp or the *P. pelagicus* F5 extract, when compared to  
391 human BACE1 alone, suggests that the mode of BACE1 inhibition by this class of carbohydrates could  
392 both involve structural destabilisation. The Hp-induced thermal instability of human BACE1 occurs in a  
393 concentration dependent manner, akin to that of the inhibitory potential of Hp in the FRET-based  
394 bioactivity assay. As for the FRET-based, BACE1 inhibition assays, *P. pelagicus* (F5) also induces  
395 comparable destabilisation of BACE1 with similar  $T_m$  values. A graph of BACE1:GAG  $T_m$  vs  
396 concentration demonstrates similar profiles for the *P. pelagicus* GAG extract and that of mammalian  
397 Hp. The relationship between Hp and *P. pelagicus* F5 concentration and biological properties that  
398 coexists for both FRET-based, BACE1 inhibition and DSF is not mirrored at defined concentrations of  
399 Hp and *P. pelagicus* F5 with regard to their distinct CD spectra and predicted secondary structure. This  
400 would suggest complex and distinct modes of interactions are present.

401  
402 One of the major obstacles that precludes the use of mammalian Hp compounds as potential  
403 BACE1 inhibitors and pharmaceutical candidates in general, is that of the significant anticoagulant  
404 potential residual within the biomolecule. This anticoagulant potential is afforded by the propensity of  
405 Hp to interact with antithrombin and thereby inhibit the human coagulation pathway, which  
406 unperturbed, ultimately results in fibrin clot formation. The anticoagulant potential of *P. pelagicus* F5  
407 has been shown to be highly attenuated in contrast to mammalian Hp, as measured by both the aPTT

408 and PT clotting assays. These coagulation assays are routinely employed, in clinical settings, to screen  
409 for the common pathway in combination with either the intrinsic (apTT) or extrinsic pathways (PT).

410

411 Major limitations for the repurposing of Hp from mammalian origins include the potential  
412 contamination risk from animal-derived viruses or prions, notably bovine spongiform encephalopathy  
413 as well as differing cultural and religious mores throughout the world. Sourcing a GAG-based inhibitor  
414 of BACE1 from marine origins would lessen the risks associated with use of mammalian Hp as it is not  
415 animal-derived and will be free from contamination with mammalian pathogens. In addition, the  
416 abundance of processed marine waste available as a byproduct of the food industry [26, 64] offers a  
417 novel and valuable resource for the large-scale isolation of GAG-like polysaccharides. These  
418 marine-sourced polysaccharides have a significant potential for future therapeutic applications  
419 [71–73].

420



## 421 **4. Materials and Methods**

### 422 **4.1 Extraction of glycosaminoglycans from *Portunus pelagicus*.**

423 2.4 kg of *Portunus pelagicus* tissue (Yeuh Chyang Canned Food Co., Ltd., Vietnam) was homogenised  
424 with excess acetone (VWR, UK) and agitated for 24 hours at r.t. Defatted, *P. pelagicus* tissue was  
425 recovered via centrifugation, 5,670 rcf at r.t. for 10 minutes and allowed to air dry. The tissue was then  
426 subjected to extensive proteolytic digestion (Alcalase®; Novozymes, Denmark) using 16.8 U.kg<sup>-1</sup> of  
427 dried tissue mass, in PBS (w/v; Gibco, UK) made up to a final concentration of 1 M NaCl (Fisher  
428 Scientific, UK), pH 8.0 and incubated at 60°C for 24 hours. Post digestion, the supernatant was  
429 collected via centrifugation (5,670 g for 10 minutes, r.t.), and subjected to ion exchange  
430 chromatography employing Amberlite IRA-900 resin (Sigma-Aldrich, UK; hydroxide counterion form)  
431 for 24 hours under constant agitation at r.t. Ion exchange resin was recovered by filtration and washed  
432 successively with distilled H<sub>2</sub>O (Fisher Scientific, UK) at 60°C with two volumes of water and 10  
433 volumes of 1 M NaCl at r.t. The ion exchange resin was then re-suspended in 1 L of 3 M NaCl and  
434 agitated for 24 hours at r.t. The ion exchange resin was removed and the filtrate added to ice cold  
435 methanol (VWR, UK), 1:1 (v/v) prior to incubation for 48 hours at 4°C. The precipitate formed was  
436 recovered by centrifugation at 4°C, 15,400 g for 1 hour and re-suspended in distilled H<sub>2</sub>O. The crude *P.*  
437 *pelagicus* extract was dialysed against distilled H<sub>2</sub>O (3.5 kDa MWCO membrane; Biorad, USA) for  
438 48 hours prior to syringe filtration (0.2 µm) and lyophilisation. The crude GAG extract was  
439 re-suspended in 1 mL of HPLC grade water and loaded onto a pre-packed DEAE-Sephacel column (10  
440 mm I.D. x 10 cm; GE Healthcare, UK) at a flow rate of 1 mL.min<sup>-1</sup>. The column was eluted using a  
441 stepwise NaCl gradient of 0, 0.25, 0.5, 0.8, 1 and 2 M NaCl at a flow rate of 1 mL.min<sup>-1</sup>, with elution  
442 monitored in-line at λ<sub>abs</sub> = 232 nm (using a UV/Vis, binary gradient HPLC system; Cecil Instruments,  
443 UK), resulting in six fractions (F1 - F6, respectively). Each of the eluted fractions were dialysed against  
444 distilled H<sub>2</sub>O, employing a 3.5 kDa MWCO (Biorad, USA) for 48 hours under constant agitation.  
445 The retentate obtained for F5 was lyophilised and stored at 4°C prior to use.

446

### 447 **4.2 Agarose gel electrophoresis**

448

449 Agarose gel electrophoresis was performed in 0.55% (w/v) agarose gels (8 x 8 cm, 1.5 mm thick)  
450 prepared in 1,3-diaminopropane-acetate buffer pH 9.0 (VWR, UK), 2-7.5 µg of the of *P. pelagicus* F5  
451 or GAG standards were subjected to electrophoresis utilizing a X-Cell SureLock™ Mini-Cell  
452 Electrophoresis System (ThermoFisher, UK). Electrophoresis was performed in 0.5 M  
453 1,3-diaminopropane-acetate buffer (pH 9.0), at a constant voltage of 150 V (~100 mA) for ~30 minutes  
454 or until the dye front had migrated ~ 8 cm from the origin. The gels were then precipitated with 0.1% w/v  
455 cetyltrimethylammonium bromide solution (VWR, UK) for a minimum of 4 hours and then stained for 1  
456 hour in 0.1% toluidine blue dissolved in acetic acid:ethanol:water (0.1:5:5). Gels were de-stained in  
457 acetic acid:ethanol:water (0.1:5:5 v/v) for ~ 30 minutes prior to image acquisition with GIMP software  
458 and processing with ImageJ.

459

460

#### 461 **4.3 Attenuated FTIR spectral analysis of marine-derived glycosaminoglycans.**

462 Samples (10 mg, lyophilised) were recorded using a Bruker Alpha I spectrometer in the region of 4000  
463 to 400  $\text{cm}^{-1}$ , for 32 scans at a resolution of 2  $\text{cm}^{-1}$  (approx 70 seconds acquisition time), 5 times.  
464 Spectral acquisition was carried-out using OPUS software (Bruker) with correction to remove the  
465 residual spectrum of the sampling environment.

466 Spectral processing and subsequent data analyses were performed using an Asus Vivobook  
467 Pro (M580VD-EB76), equipped with an intel core i7-7700HQ. Spectra were smoothed, employing a  
468 Savitzky-Golay smoothing algorithm (R studio v1.1.463; *signal* package, *sgolayfilter*), to a 2<sup>nd</sup> degree  
469 polynomial with 21 neighbours prior to baseline correction employing a 7th order polynomial and  
470 subsequent normalisation (0-1).  $\text{CO}_2$  and  $\text{H}_2\text{O}$  regions were removed prior to further analysis, in order  
471 to negate environmental variability ( $< 700 \text{ cm}^{-1}$ , between 2000 and 2500  $\text{cm}^{-1}$  and  $> 3600 \text{ cm}^{-1}$ ). Second  
472 derivatives plots were calculated using the Savitzky-Golay algorithm, with 41 neighbours and a 2<sup>nd</sup>  
473 order polynomial.

474 The normalised and corrected matrix of intensities was subject to PCA using singular value  
475 decomposition in R studio (v1.1.463) with the mean centred, *base prcomp* function deployed.

#### 476 **4.4 Nuclear Magnetic Resonance (NMR)**

477 NMR experiments were performed upon *P. pelagicus* F5 (5 mg) dissolved in  $\text{D}_2\text{O}$  (600  $\mu\text{L}$ ; VWR,  
478 Brazil) containing TMSP (0.003% v/v; VWR, Brazil) at 343 K using a 500 MHz Avance Neo  
479 spectrometer fitted with a 5 mm TXI Probe (Bruker). In addition to 1-dimensional ( $^1\text{H}$ ) spectra,  $^1\text{H}$ - $^{13}\text{C}$   
480 Heteronuclear Single-Quantum Correlation (HSQC) 2-dimensional spectra were collected using  
481 standard pulse sequences available. Spectra were processed and integrated using TopSpin (Bruker).

#### 482 **4.5 Constituent $\Delta$ -disaccharide analysis of Hp/HS-like, marine-derived carbohydrates.**

483 Hp and *P. pelagicus* F5 carbohydrate samples were re-suspended in lyase digestion buffer (50  $\mu\text{L}$ ; 25  
484 mM sodium acetate, 5 mM calcium acetate (VWR, UK), pH 7) prior to exhaustive digestion by the  
485 sequential addition of a cocktail of the three recombinantly expressed heparinase enzymes (I, III & II)  
486 from the soil bacterium *Flavobacterium heparinum* (2.5  $\text{mIU}\cdot\text{mg}^{-1}$ ; Iduon, UK). Samples were  
487 incubated for 4 hrs at 37  $^\circ\text{C}$  prior to a further addition of the same quantity of enzymes and an additional  
488 overnight incubation. Samples were then heated briefly at 95 $^\circ\text{C}$  post enzyme digestion (5 mins) and  
489 allowed to cool.

490  
491 Denatured heparinase enzymes were removed from the sample solution by immobilisation  
492 upon a pre-washed (50% methanol (aq.) followed by HPLC grade  $\text{H}_2\text{O}$ )  $\text{C}^{18}$  spin column (Pierce, UK);  
493 whereby the newly liberated  $\Delta$ -disaccharides were present in the column eluate upon washing with  
494 HPLC grade  $\text{H}_2\text{O}$ .

495  
496 Lyophilised  $\Delta$ -disaccharide samples from Hp and *P. pelagicus* F5 were desalinated by  
497 immobilisation up on graphite spin columns (Pierce, UK) that had been extensively prewashed with  
498 80% acetonitrile, 0.5% (aq.) trifluoroacetic acid and HPLC grade  $\text{H}_2\text{O}$  prior to use.  $\Delta$ -disaccharides  
499 liberated from the exhaustive, heparinase digestion were separated from buffer salts by extensive  
500 washing with HPLC grade  $\text{H}_2\text{O}$  prior to elution with a solution of 40% acetonitrile, 0.5% trifluoroacetic

501 acid (aq.). Contaminant, non  $\Delta$ -disaccharide components of the spin column eluate were removed by  
502 serial lyophilization prior to chromatographic separation, using high performance anion exchange  
503 chromatography (HPAEC).

504

505 Heparinase digested samples (50  $\mu\text{g}$ ) were made up in HPLC grade  $\text{H}_2\text{O}$  (1 mL) immediately  
506 before injection onto a ProPac PA-1 analytical column (4  $\times$  250 mm, ThermoFisher Scientific, UK),  
507 pre-equilibrated in HPLC grade  $\text{H}_2\text{O}$  at a flow rate of 1 mL.min<sup>-1</sup>. The column was held under isocratic  
508 flow for 10 mins prior to developing a linear gradient from 0 to 2 M NaCl (HPLC grade; VWR, UK) over  
509 60 mins. Eluted  $\Delta$ -disaccharides were detected absorbing within the UV range ( $\lambda_{\text{abs}} = 232 \text{ nm}$ ) via the  
510 unsaturated C=C bond, present between C<sub>4</sub> and C<sub>5</sub> of the uronic acid residues, introduced as a  
511 consequence of lyase digestion.

512

513 Authentic  $\Delta$ -disaccharide reference standards, comprising the 8 common standards found in  
514 Hp and HS (Iduron, UK), were employed as a mixture (each at 5  $\mu\text{g}.\text{mL}^{-1}$ ) and served as a  
515 chromatographic references with elution times cross-correlated with Hp and *P. pelagicus* F5 samples.  
516 The column was washed extensively, with 2 M NaCl and HPLC grade water, prior to use and between  
517 runs.

518

519 **4.6 Determination of human BACE1 inhibitory activity using Förster resonance energy transfer.**

520 *P. pelagicus* F5 and Hp were assayed for inhibitory potential against human beta-secretase (BACE1)  
521 using the fluorescence resonance energy transfer (FRET) inhibition assay, essentially as described by  
522 Patey et al (2006) [18]. Human BACE1 (312.5 ng), and *P. pelagicus* F5 or Hp were incubated in 50 mM  
523 sodium acetate pH 4.0 at 37°C for 10 minutes, followed by the addition a quenched fluorogenic peptide  
524 substrate (6.25  $\mu\text{M}$ ; Biomatik, Canada; MCA-SEVNLDAEFRK(DNP)RR-NH<sub>2</sub>; pre-incubated at 37°C  
525 for 10 minutes) to a final well volume of 50  $\mu\text{L}$ . Fluorescent emission was recorded using a Tecan  
526 Infinite® M200 Pro multiwell plate reader with i-control™ software ( $\lambda_{\text{ex}} = 320 \text{ nm}$ ,  $\lambda_{\text{em}} = 405 \text{ nm}$ ) over 90  
527 minutes. The relative change in fluorescence per minute was calculated in the linear range of the no  
528 inhibitor control, with normalized percentage inhibition calculated ( $\% \pm \text{SD}$ ,  $n = 3$ ) compared to the  $\bar{x}$  of  
529 substrate only and no inhibitor control, followed by fitting to a four-parameter logistics model using  
530 Prism 7 (GraphPad).

531 **4.7 Secondary structure determination of human BACE1 by circular dichroism spectroscopy.**

532 The circular dichroism (CD) spectra of native, human BACE1 (6.12  $\mu\text{M}$ , 30  $\mu\text{l}$ ; Acro Biosystems, USA)  
533 in 50 mM sodium acetate (pH 4.0; VWR, UK) was obtained using a J-1500 Jasco CD spectrometer and  
534 Spectral Manager II software, equipped with a 0.2 mm path length quartz cuvette (Hellma, USA)  
535 operating at a scan speed of 100 nm.min<sup>-1</sup> with 1 nm resolution over the range  $\lambda = 190 - 320 \text{ nm}$ .  
536 Spectra obtained were the mean of five independent scans. Human BACE1 was buffer exchanged (in  
537 order to remove commercially supplied buffer) prior to spectral analysis using a 10 kDa Vivaspin  
538 centrifugal filter (Sartorius, Germany) at 12,000 g washed thrice. Collected data was processed using  
539 Spectral Manager II software and data analysis carried out with GraphPad Prism 7, employing a  
540 second order polynomial smoothed to 9 neighbours. Secondary structure prediction was performed  
541 utilizing the BeStSel analysis server on the unsmoothed data [50]. To ensure the CD spectral change of  
542 BACE1 in the presence of each GAG was not altered owing to the addition of the GAG alone, which are

543 known to possess CD spectra at high concentrations [74,75], GAG control spectra were subtracted  
544 before analysis. In addition, the theoretical, summative CD spectra was confirmed to differ from the  
545 observed experimental CD spectra, thereby indicating that the change in the CD spectra compared to  
546 that of BACE1 alone is a result of a conformational change upon binding to the GAG. The  
547 conformational change observed is believed to occur as a result of changes solely in BACE1  
548 secondary structure, as GAG controls exhibited negligible spectra at the concentration used. All CD  
549 data have been presented with GAG controls subtracted.

#### 550 **4.8 Investigating the thermal stability of human BACE1 with differential scanning fluorimetry.**

551 Differential scanning fluorimetry (DSF) was carried out using the method of Uniewicz et al. (2014) [76]  
552 based on a modification to the original method of Niesen et al. (2007) (Uniewicz, Ori, Ahmed, Yates, &  
553 Fernig, 2014) [76,77]. DSF was performed on human BACE1 (1 µg) using 96-well qPCR plates (AB  
554 Biosystems, UK) with 20x Sypro Orange (Invitrogen, UK) in 50 mM sodium acetate, pH 4.0 in a final  
555 well volume of 40 µl. Hp or mGAG were included, as necessary, to a maximal concentration of 200  
556 µg.mL<sup>-1</sup>. An AB Biosystems StepOne plus qPCR machine, with the TAMRA filter set deployed, was  
557 used to carry out melt curve experiments, with an initial incubation phase of 2 minutes at 20°C,  
558 increasing by 0.5°C increments every 30 seconds up to a final temperature of 90°C. Data analysis was  
559 completed using Prism 7 (GraphPad) with first derivative plots smoothed to 19 neighbours, using a  
560 second order polynomial (Savitzky-Golay). The peak of the first derivatives (yielding T<sub>m</sub>s) was  
561 determined using MatLab (MathWorks) software.

#### 562 **4.9 Activated partial thromboplastin time (APTT)**

563 Serially diluted GAG samples (25 µl) were incubated with pooled, normal human citrated plasma (50 µl;  
564 Technoclone, UK) and Pathromtin SL reagent (50 µl; Siemens, UK) for 2 mins at 37°C prior to the  
565 addition of calcium chloride (25 µl, 50 mM; Alfa Aesar, UK). The time taken for clot formations to occur  
566 (an upper maximal of 2 mins was imposed, represented as 100% inhibition of clotting) were recorded  
567 using a Thrombotrak Solo coagulometer (Axis-Shield). HPLC grade H<sub>2</sub>O (0% inhibition of clotting,  
568 representing a normal aPTT clotting time, of ≈ 37-40 seconds) and porcine mucosal heparin (193  
569 IU.mg<sup>-1</sup>; Celsus, USA) were screened as controls. The EC<sub>50</sub> values of all test and control samples  
570 were determined using a sigmoidal dose response curve fitted with GraphPad Prism 7.

#### 571 **4.10 Prothrombin time (PT)**

572 Serially diluted GAGs (50 µl) or control (H<sub>2</sub>O, HPLC grade) were incubated with pooled, normal human  
573 citrated plasma (50 µl) for 1 minute at 37°C prior to the addition of Thromborel S reagent (50 µl;  
574 Siemens, UK). The time taken for clot formations to occur (an upper maximal of 2 minutes was  
575 imposed, representing 100% inhibition of clotting) were recorded using a Thrombotrak Solo  
576 coagulometer. HPLC grade H<sub>2</sub>O (0% inhibition of clotting, representing a normal PT clotting time of ≈  
577 13-14 seconds) and porcine mucosal heparin (193 IU.mg<sup>-1</sup>; Celsus, USA) were screened as controls.  
578 The EC<sub>50</sub> values of all test and control samples were determined using a sigmoidal dose response  
579 curve fitted with GraphPad Prism 7.

580

581 **Supplementary Materials:** Figure S1: The CD structural change of BACE1 observed in the presence of *P.*  
582 *pelagicus* F5 with a ratio of 2:1 w/w.

583

584 **Acknowledgments:** The authors would like to thank Dr. Sarah Taylor for technical assistance with the use of CD  
585 instrumentation.

586

587

588 **References**

- 589 1. Lane, C.; Hardy, J.; Schott, J.M. Alzheimer's disease. *Eur J Neurol.* 2017, 25(1), 59–70.  
590 DOI:10.1111/ene.13439.
- 591 2. Tan, J.Z.A.; Gleeson, P.A. The role of membrane trafficking in the processing of amyloid precursor protein  
592 and production of amyloid peptides in Alzheimer's disease. *Biochim Biophys Acta - Biomembr.* 2019,  
593 1861(4), 697–712. DOI:10.1016/j.bbamem.2018.11.013
- 594 3. Cruts, M.; Theuns, J.; Van Broeckhoven, C. Locus-specific mutation databases for neurodegenerative  
595 brain diseases. *Hum Mutat.* 2012, 33(9), 1340–4. DOI:10.1002/humu.22117. Available online:  
596 <http://www.molgen.vib0ua.be/ADMutations> (accessed on 20/03/2019).
- 597 4. Cai, H.; Wang, Y.; McCarthy, D.; Wen, H.; Borchelt, D.R.; Price, D.L.; Wong, P, C. BACE1 is the major  
598  $\beta$ -secretase for generation of A $\beta$  peptides by neurons. *Nat Neurosci.* 2001, 4(3), 233–4.  
599 DOI:10.1038/85064.
- 600 5. Querfurth, H.W.; LaFerla, F.M. Alzheimer's Disease. *N Engl J Med.* 2010, 362(4), 329–44.  
601 DOI:10.1056/NEJMra0909142
- 602 6. Lichtenthaler, S.F.; Haass, C.; Steiner, H. Regulated intramembrane proteolysis - lessons from amyloid  
603 precursor protein processing. *J Neurochem.* 2011, 117(5), 779–96. doi:  
604 10.1111/j.1471-4159.2011.07248.x.
- 605 7. Walsh, D.M.; Selkoe, D.J. A $\beta$  Oligomers - a decade of discovery. *J Neurochem.* 2007, 101(5), 1172–84.  
606 DOI: 10.1111/j.1471-4159.2006.04426.x.
- 607 8. Thinakaran, G.; Koo, E.H. Amyloid precursor protein trafficking, processing, and function. *J Biol Chem* .  
608 2008, 283(44), 29615–9. DOI: 10.1074/jbc.R800019200.
- 609 9. Vassar, R. BACE1 inhibition as a therapeutic strategy for Alzheimer's disease. *J Sport Heal Sci.* 2016  
610 Dec, 5(4), 388–90. DOI: 10.1016/j.jshs.2016.10.004.
- 611 10. Roberds, S.L.; Anderson, J.; Basi, G.; Bienkowski, M.J.; Branstetter, D.G.; Chen, K.S.; *et al.* BACE  
612 knockout mice are healthy despite lacking the primary beta-secretase activity in brain: implications for  
613 Alzheimer's disease therapeutics. *Hum Mol Genet.* 2001, 10(12), 1317–24.  
614 DOI:/10.1093/hmg/10.12.1317.
- 615 11. Luo, Y.; Bolon, B.; Kahn, S.; Bennett, B.D.; Babu-Khan, S.; Denis, P.; *et al.* Mice deficient in BACE1, the  
616 Alzheimer's  $\beta$ -secretase, have normal phenotype and abolished  $\beta$ -amyloid generation. *Nat Neurosci.*  
617 2001, 4(3),231–2. DOI: 10.1038/85059.
- 618 12. Dominguez, D.; Tournoy, J.; Hartmann, D.; Huth, T.; Cryns, K.; Deforce, S.; *et al.* Phenotypic and  
619 Biochemical Analyses of BACE1- and BACE2-deficient Mice. *J Biol Chem.* 2005, 280(35), 30797–806. DOI:  
620 10.1074/jbc.M505249200.
- 621 13. Ohno, M.; Sametsky, E.A.; Younkin, L.H.; Oakley, H.; Younkin, S.G.; Citron M, *et al.* BACE1 deficiency  
622 rescues memory deficits and cholinergic dysfunction in a mouse model of Alzheimer's disease. *Neuron.*  
623 2004, 41(1), 27–33. DOI:10.1016/S0896-6273(03)00810-9.
- 624 14. Ohno, M.; Cole, S.L.; Yasvoina, M.; Zhao, J.; Citron, M.; Berry, R.; *et al.* BACE1 gene deletion prevents  
625 neuron loss and memory deficits in 5XFAD APP/PS1 transgenic mice. *Neurobiol Dis.* 2007, 26(1), 134–45. DOI:  
626 10.1016/j.nbd.2006.12.008.
- 627 15. McConlogue, L.; Buttini, M.; Anderson, J.P.; Brigham, E.F.; Chen, K.S.; Freedman, S.B.; *et al.* Partial  
628 Reduction of BACE1 Has Dramatic Effects on Alzheimer Plaque and Synaptic Pathology in APP Transgenic  
629 Mice. *J Biol Chem.* 2007, 282(36), 26326–34. DOI:10.1074/jbc.M611687200.

- 630 16. Vassar, R. BACE1 inhibitor drugs in clinical trials for Alzheimer's disease. *Alzheimers Res Ther.* 2014, 6(9),  
631 89. Available from: DOI:10.1186/s13195-014-0089-7.
- 632 17. Scholefield, Z.; Yates, E.A.; Wayne, G.; Amour, A.; McDowell, W.; Turnbull, J.E. Heparan sulfate  
633 regulates amyloid precursor protein processing by BACE1, the Alzheimer's beta-secretase. *J Cell Biol.*  
634 2003, 163(1), 97–107. DOI:10.1083/jcb.200303059.
- 635 18. Patey, S.J.; Edwards, E.A.; Yates, E.A.; Turnbull, J.E. Heparin derivatives as inhibitors of BACE-1, the  
636 Alzheimer's  $\beta$ -secretase, with reduced activity against factor Xa and other proteases. *J Med Chem.* 2006,  
637 49(20), 6129–32. DOI:10.1021/jm051221o
- 638 19. Patey, S.J.; Edwards E.A.; Yates, E.A.; Turnbull, J.E. Engineered heparins: novel beta-secretase inhibitors  
639 as potential Alzheimer's disease therapeutics. *Neurodegener Dis.* 2008, 5(3–4), 197–9.  
640 DOI:10.1159/000113701.
- 641 20. Bergamaschini, L.; Rossi, E.; Storini, C.; Pizzimenti, S.; Distaso, M.; Perego, C.; *et al.* Peripheral Treatment  
642 with Enoxaparin, a Low Molecular Weight Heparin, Reduces Plaques and Amyloid Accumulation in a Mouse  
643 Model of Alzheimer's Disease. *J Neurosci.* 2004, 24(17), 4181–6. DOI:10.1523/JNEUROSCI.0550-04.2004.
- 644 21. Timmer, N.M.; van Dijk, L.; van der Zee, C.E.; Kiliaan, A.; de Waal, R.M.; Verbeek, M.M. Enoxaparin  
645 treatment administered at both early and late stages of amyloid  $\beta$  deposition improves cognition of  
646 APPsw/PS1dE9 mice with differential effects on brain A $\beta$  levels. *Neurobiol Dis.* 2010, 40(1), 340–7.  
647 DOI:10.1016/j.nbd.2010.06.008.
- 648 22. Leveugle, B.; Ding, W.; Laurence, F.; Dehouck, M.P.; Scanameo, A.; Cecchelli, R.; *et al.* Heparin  
649 oligosaccharides that pass the blood-brain barrier inhibit beta-amyloid precursor protein secretion and  
650 heparin binding to beta-amyloid peptide. *J Neurochem.* 1998, 70(2), 736–44.  
651 DOI:10.1046/j.1471-4159.1998.70020736.x.
- 652 23. Hoffart, V.; Lamprecht, A.; Maincent, P.; Lecompte, T.; Vigneron, C.; Ubrich, N. Oral bioavailability of a low  
653 molecular weight heparin using a polymeric delivery system. *J Control Release.* 2006, 113(1), 38–42.  
654 DOI:10.1016/j.jconrel.2006.03.020.
- 655 24. Stewart, K.L.; Hughes, E.; Yates, E.A.; Middleton, D.A.; Radford, S.E. Molecular Origins of the Compatibility  
656 between Glycosaminoglycans and A $\beta$ 40 Amyloid Fibrils. *J Mol Biol.* 2017, 429(16), 2449–62.  
657 DOI:10.1016/j.jmb.2017.07.003
- 658 25. Andrade, P.V.G.; Lima, A.M.; de Souza Junior, A.A.; Fareed, J.; Hoppensteadt, A.D.; Santos, E.; *et al.* A  
659 heparin-like compound isolated from a marine crab rich in glucuronic acid 2-O-sulfate presents low  
660 anticoagulant activity. *Carbohydr Polym.* 2013, 94(1), 647–54. DOI:10.1016/j.carbpol.2013.01.069.
- 661 26. Cavalcante, R.S.; Brito, A.S.; Palhares, L.C.G.F.; Lima, M.A.; Cavalheiro, P.R.; Nader, H.B.; Sasaki, G.L.;  
662 Chavante, S. F. 2, 3-Di- O -sulfo glucuronic acid : An unmodified and unusual residue in a highly sulfated  
663 chondroitin sulfate from *Litopenaeus vannamei*. *Carbohydr Polym.* 2018, 183, 192–200.  
664 DOI:10.1016/j.carbpol.2017.12.018.
- 665 27. Pavão, M.S.G.; Glycosaminoglycans analogs from marine invertebrates : structure , biological effects , and  
666 potential as new therapeutics. *Front Cell Infect Microbiol.* 2014, 4,1–6. doi: 10.3389/fcimb.2014.00123.
- 667 28. Cavalcante, M.C.M.; Allodi, S.; Valente, A.P.; Straus, A.H.; Takahashi, H.K.; Mourao, P.A.S.; *et al.*  
668 Occurrence of heparin in the invertebrate *Styela plicata* (Tunicata) is restricted to cell layers facing the  
669 outside environment: An ancient role in defense? *J Biol Chem.* 2000, 275(46), 36189–96.  
670 DOI:10.1074/jbc.M005830200

- 671 29. Cardilo-Reis, L.; Cavalcante, M.C.; Silveira, M.C.; Pavão, M.S. In vivo antithrombotic properties of a heparin  
672 from the oocyte test cells of the sea squirt *Styela plicata* (Chordata-Tunicata). 2006, 39, 1409–15.  
673 DOI:10.1590/S0100-879X2006001100004.
- 674 30. Gomes, A.M.; Kozłowski, E.O.; Borsig, L.; Teixeira, F.C.O.B.; Vlodaysky, I.; Pavão, M.S.G. Antitumor  
675 properties of a new non-anticoagulant heparin analog from the mollusk *Nodipecten nodosus*: Effect on  
676 P-selectin, heparanase, metastasis and cellular recruitment. 2015, 25(4), 386–93.  
677 DOI:10.1093/glycob/cwu119.
- 678 31. Santos, J.C.; Mesquita, J.M.F.; Belmiro, C.L.R.; Carolina, B.M.; Viskov, C.; Mourier, P.A.; et al. Isolation and  
679 characterization of a heparin with low antithrombin activity from the body of *Styela plicata* (  
680 Chordata-Tunicata). Distinct effects on venous and arterial models of thrombosis. *Thromb Res.*  
681 2007;213–23. DOI:10.1016/j.thromres.2007.03.025
- 682 32. Gomes, A.M.; Kozłowski, E.O.; Pomin, V, H.; de Barros, C.M.; Zaganeli, J.L.; Pavão, M.S. Unique  
683 Extracellular Matrix Heparan Sulfate from the Bivalve *Nodipecten nodosus* (Linnaeus, 1758) Safely Inhibits  
684 Arterial Thrombosis after Photochemically Induced Endothelial Lesion. *J Biol Chem.* 2010, 285(10), 7312–23.  
685 DOI: 10.1074/jbc.M109.091546
- 686 33. Luppi, E.; Cesaretti, M.; Volpi, N. Purification and Characterization of Heparin from the Italian Clam *Callista*  
687 *chione*. *Biomacromolecules.* 2005, 6(3), 1672–8. DOI:10.1021/bm049196b
- 688 34. Bergefall, K.; Trybala, E.; Johansson, M.; Uyama, T.; Yamada, S.; Kitagawa, H.; et al. Chondroitin sulfate  
689 characterized by the E-disaccharide unit is a potent inhibitor of herpes simplex virus infectivity and provides  
690 the virus binding sites on gro2C cells. *J Biochemical Chem.* 2005, 280(37), 32193–9.  
691 DOI:10.1074/jbc.M503645200.
- 692 35. Huang, N.; Wu, M.Y.; Zheng, C.B.; Zhu, L.; Zhao, J.H.; Zheng, Y.T. The depolymerized fucosylated  
693 chondroitin sulfate from sea cucumber potentially inhibits HIV replication via interfering with virus entry.  
694 *Carbohydr Res.* 2013, 380, 64–9. DOI:10.1016/j.carres.2013.07.010.
- 695 36. Bastos, F.M.; Albrecht, L.; Kozłowski, O.E.; Lopes, P.C.S.; Blanco, C.Y.; Carlos, C.B.; et al. Fucosylated  
696 Chondroitin Sulphate Inhibits *Plasmodium falciparum* Cytoadhesion and Merozoite Invasion. *Antimicrob*  
697 *Agents Chemother.* 2014, 58(4), 1862–71. DOI: 10.1128/AAC.00686-13.
- 698 37. Marques, J.; Vilanova, E.; Mourao, S.A.P.; Fernandez-Busquets, X. Marine organism sulfated  
699 polysaccharides exhibiting significant antimalarial activity and inhibition of red blood cell invasion by  
700 *plasmodium*. *Sci Rep.* 2016, 6, 24368. DOI:10.1038/srep24368.
- 701 38. Brito, A.S.; Arimatéia, D.S.; Souza, L.R.; Lima, M.A.; Santos, V.O.; Medeiros, V.P.; et al. Anti-inflammatory  
702 properties of a heparin-like glycosaminoglycan with reduced anti-coagulant activity isolated from a marine  
703 shrimp. *Bioorg Med Chem.* 2008, 16(21), 9588–95. DOI:10.1016/j.bmc.2008.09.020
- 704 39. Suleria, H.A.R.; Masci, P.P.; Addepalli, R.; Chen, W.; Gobe, G.C.; Osborne, S.A. In vitro anti-thrombotic and  
705 anti-coagulant properties of blacklip abalone (*Haliotis rubra*) viscera hydrolysate. *Anal Bioanal Chem.* 2017,  
706 409(17), 4195–205. DOI: 10.1007/s00216-017-0367-x.
- 707 40. Khurshid, C.; Pye, D.; Khurshid, C.; Pye, D.A. Isolation and Composition Analysis of Bioactive  
708 Glycosaminoglycans from Whelk. *Mar Drugs.* 2018, 16(5), 171. DOI:10.3390/md16050171.
- 709 41. Aldairi, A.F.; Ogundipe, O.D.; Pye, D.A. Antiproliferative Activity of Glycosaminoglycan-Like Polysaccharides  
710 Derived from Marine Molluscs. *Mar Drugs.* 2018, 16(2), 63. DOI: 10.3390/md16020063.
- 711 42. Hu, S.; Jiang, W.; Li, S.; Song, W.; Ji, L.; Cai, L.; et al. Fucosylated chondroitin sulphate from sea cucumber  
712 reduces hepatic endoplasmic reticulum stress-associated inflammation in obesity mice. *J Funct Foods.*  
713 2015, 16, 352–63. DOI: 10.1016/j.jff.2015.04.036.



- 714 43. Hikino, M.; Mikami, T.; Faissner, A.; Vilela-Silva, A.C.; Pavão, M.S.; Sugahara, K. Oversulfated Dermatan  
715 Sulfate Exhibits Neurite Outgrowth-promoting Activity toward Embryonic Mouse Hippocampal Neurons. *J*  
716 *Biol Chem.* 2003, 278(44), 43744–54. DOI:10.1074/jbc.M308169200.
- 717 44. Devlin, A.; Mycroft-West, C.J.; Guerrini, M.; Yates, E.A. Analysis of solid-state heparin samples by ATR-FTIR  
718 spectroscopy. *bioRxiv.* 2019, 538074. DOI: 10.1101/538074.
- 719 45. Skidmore, M.A.; Guimond, S.E.; Dumax-Vorzet, A.F.; Atrih, A.; Yates, E.A.; A. Turnbull, J.E. High sensitivity  
720 separation and detection of heparan sulfate disaccharides. *J Chromatogr A.* 2006, 1135(1), 52–6.  
721 DOI:10.1016/j.chroma.2006.09.064
- 722 46. Dietrich, C.P.; Tersariol, I.L.; Toma, L.; Moraes, C.T.; Porcionatto, M.A.; Oliveira, F.W.; et al. Structure of  
723 heparan sulfate: identification of variable and constant oligosaccharide domains in eight heparan sulfates of  
724 different origins. *Cell Mol Biol (Noisy-le-grand).* 1998, 44(3), 417–29.
- 725 47. Zhang, Z.; Xie, J.; Liu, H.; Liu, J.; Linhardt, R.J. Quantification of heparan sulfate disaccharides using  
726 ion-pairing reversed-phase microflow high-performance liquid chromatography with electrospray ionization  
727 trap mass spectrometry. *Anal Chem.* 2009, 81(11), 4349–55. DOI: 10.1021/ac9001707.
- 728 48. Klaver, D.W.; Wilce, M.C.J.; Gasperini, R.; Freeman, C.; Juliano, J.P.; Parish, C.; et al.  
729 Glycosaminoglycan-induced activation of the  $\beta$ -secretase (BACE1) of Alzheimer's disease. *J Neurochem.*  
730 2010, 112, 1552–61. DOI:10.1111/j.1471-4159.2010.06571.x
- 731 49. Beckman, M.; Holsinger, R.M.D.; Small, D.H. Heparin activates  $\beta$ -secretase (BACE1) of Alzheimer's disease  
732 and increases autocatalysis of the enzyme. *Biochemistry.* 2006, 45(21), 6703–14. DOI: 10.1021/bi052498t.
- 733 50. Micsonai, A.; Wien, F.; Kernya, L.; Lee, Y.H.; Goto, Y.; Réfrégiers, M.; et al. Accurate secondary structure  
734 prediction and fold recognition for circular dichroism spectroscopy. *Proc Natl Acad Sci.* 2015, 112(24),  
735 E3095–103. DOI: 10.1073/pnas.1500851112.
- 736 51. Gasymov, O.K.; Abduragimov, A.R.; Glasgow, B.J. Probing tertiary structure of proteins using single Trp  
737 mutations with circular dichroism at low temperature. *J Phys Chem B.* 2014, 118(4), 986–95. DOI:  
738 10.1021/jp4120145.
- 739 52. De Simone, A.; Mancini, F.; Fernández F.R.; Rovero, P.; Bertucci, C.; Andrisano, V. Surface plasmon  
740 resonance, fluorescence, and circular dichroism studies for the characterization of the binding of BACE-1  
741 inhibitors. *Anal Bioanal Chem.* 2013, 405(2), 827–35. DOI:10.1007/s00216-012-6312-0.
- 742 53. Greenfield, N.J. Using circular dichroism spectra to estimate protein secondary structure. *Nat Protoc.* 2006,  
743 1(6), 2876. DOI: 10.1007/s00216-012-6312-0).
- 744 54. Shimizu, H.; Tosaki, A.; Kaneko, K.; Hisano, T.; Sakurai, T.; Nukina, N. Crystal Structure of an Active Form of  
745 BACE1, an Enzyme Responsible for Amyloid  $\beta$  Protein Production. *Mol Cell Biol.* 2008, 28(11), 3663–71.  
746 DOI: 10.1128/MCB.02185-07.
- 747 55. Sreerama, N.; Woody, R.W. On the analysis of membrane protein circular dichroism spectra. *Protein Sci.*  
748 2004, 13(1), 100–12.
- 749 56. Gasymov KO, Glasgow J Ben. ANS Fluorescence: Potential to Augment the Identification of the External  
750 Binding Sites of Proteins. *Biochim Biophys Acta.* 2007;1774(3):403–11.
- 751 57. Lo M-C, Aulabaugh A, Jin G, Cowling R, Bard J, Malamas M, et al. Evaluation of fluorescence-based  
752 thermal shift assays for hit identification in drug discovery. *Anal Biochem [Internet].* 2004 Sep 1 [cited 2018  
753 Nov 28];332(1):153–9. Available from:  
754 <https://www.sciencedirect.com/science/article/pii/S0003269704003756?via%3Dihub>
- 755 58. Casu B, Grazioli G, Razi N, Guerrini M, Naggi A, Torri G, et al. Heparin-like compounds prepared by  
756 chemical modification of capsular polysaccharide from E. coli K5. *Carbohydr Res [Internet].* 1994 Oct 17

- 757 [cited 2019 Apr 18];263(2):271–84. Available from: <http://www.ncbi.nlm.nih.gov/pubmed/7805054>
- 758 59. Yates EA, Santini F, Guerrini M, Naggi A, Torri G, Casu B. <sup>1</sup>H and <sup>13</sup>C NMR spectral assignments of the  
759 major sequences of twelve systematically modified heparin derivatives. *Carbohydr Res* [Internet]. 1996  
760 Nov 20 [cited 2019 Apr 18];294:15–27. Available from: <http://www.ncbi.nlm.nih.gov/pubmed/8962483>
- 761 60. Pomin VH. Holothurian fucosylated chondroitin sulfate. *Mar Drugs*. 2014;12(1):232–54.
- 762 61. Vasconcelos A. ., Pomin VH. The Sea as a Rich Source of Structurally Unique Glycosaminoglycans and  
763 Mimetics. *microorganisms* [Internet]. 2017;5(1). Available from: <http://www.mdpi.com/2076-2607/5/3/51>
- 764 62. Pavão MSG. Glycosaminoglycans analogs from marine invertebrates: structure, biological effects, and  
765 potential as new therapeutics. *Front Cell Infect Microbiol* [Internet]. 2014 Sep 10 [cited 2018 Apr 26];4:123.  
766 Available from: <http://journal.frontiersin.org/article/10.3389/fcimb.2014.00123/abstract>
- 767 63. Dietrich CP, Paiva JF, Castro RAB, Chavante SF, Jeske W, Fareed J, et al. Structural features and  
768 anticoagulant activities of a novel natural low molecular weight heparin from the shrimp *Penaeus*  
769 *brasiliensis*. *Biochim Biophys Acta - Gen Subj* [Internet]. 1999 Aug 5 [cited 2018 Mar  
770 29];1428(2–3):273–83. Available from:  
771 <https://www.sciencedirect.com/science/article/pii/S0304416599000872>
- 772 64. Dietrich PC, Paiva F, Castro RAB, Chavante SF, Y CPD, Jeske W, et al. Structural features and  
773 anticoagulant activities of a novel natural low molecular weight heparin from the shrimp *Penaeus*  
774 *brasiliensis*. 1999;1428:273–83.
- 775 65. Medeiros GF, Mendes A, Castro RAB, Baú EC, Nader HB, Dietrich CP. Distribution of sulfated  
776 glycosaminoglycans in the animal kingdom: widespread occurrence of heparin-like compounds in  
777 invertebrates. *Biochim Biophys Acta - Gen Subj* [Internet]. 2000 Jul 26 [cited 2018 Mar  
778 29];1475(3):287–94. Available from:  
779 <https://www.sciencedirect.com/science/article/pii/S0304416500000799>
- 780 66. Brito AS, Cavalcante RS, Palhares LCGF, Hughes AJ, Andrade GP V, Yates EA, et al. A non-hemorrhagic  
781 hybrid heparin / heparan sulfate with anticoagulant potential. *Carbohydr Polym* [Internet]. 2014;99:372–8.  
782 Available from: <http://dx.doi.org/10.1016/j.carbpol.2013.08.063>
- 783 67. Chavante SF, Brito AS, Lima M, Yates E, Nader H, Guerrini M, et al. A heparin-like glycosaminoglycan  
784 from shrimp containing high levels of 3-O-sulfated D -glucosamine groups in an unusual trisaccharide  
785 sequence. *Carbohydr Res* [Internet]. 2014;390:59–66. Available from:  
786 <http://dx.doi.org/10.1016/j.carres.2014.03.002>
- 787 68. Chavante SF, Santos EA, Oliveira FW, Guerrini M, Torri G, Casu B, et al. A novel heparan sulphate with  
788 high degree of N -sulphation and high heparin cofactor-II activity from the brine shrimp *Artemia*  
789 *franciscana*. 2000;27:49–57.
- 790 69. Lima M, Rudd T, Yates E. New Applications of Heparin and Other Glycosaminoglycans. [cited 2018 Jan  
791 31]; Available from:  
792 <https://pdfs.semanticscholar.org/7fbd/52eb71b92ee48dea3ee0e83aa9e812bf80ed.pdf>
- 793 70. Spronk SA, Carlson HA. The role of tyrosine 71 in modulating the flap conformations of BACE1. *Proteins*  
794 *Struct Funct Bioinforma* [Internet]. 2011 Jul [cited 2019 Apr 18];79(7):2247–59. Available from:  
795 <http://doi.wiley.com/10.1002/prot.23050>
- 796 71. Suleria HAR, Gobe G, Masci P, Osborne SA. Marine bioactive compounds and health promoting  
797 perspectives; innovation pathways for drug discovery. *Trends Food Sci Technol* [Internet]. 2016 Apr 1  
798 [cited 2018 Mar 29];50:44–55. Available from:  
799 <https://www.sciencedirect.com/science/article/pii/S0924224416000224>
- 800 72. Suleria HAR, Masci P, Gobe G, Osborne S. Current and potential uses of bioactive molecules from marine

- 801 processing waste [Internet]. Vol. 96, Journal of the Science of Food and Agriculture. Wiley-Blackwell;  
802 2016 [cited 2018 Mar 30]. p. 1064–7. Available from: <http://doi.wiley.com/10.1002/jsfa.7444>
- 803 73. Cahú TB, Santos SD, Mendes A, Córdula CR, Chavante SF, Carvalho LB, et al. Recovery of protein ,  
804 chitin , carotenoids and glycosaminoglycans from Pacific white shrimp ( *Litopenaeus vannamei* )  
805 processing waste. *Process Biochem* [Internet]. 2012;47(4):570–7. Available from:  
806 <http://dx.doi.org/10.1016/j.procbio.2011.12.012>
- 807 74. Rudd TR, Guimond SE, Skidmore MA, Duchesne L, Guerrini M, Torri G, et al. Influence of substitution  
808 pattern and cation binding on conformation and activity in heparin derivatives. *Glycobiology* [Internet].  
809 2007 Sep 1 [cited 2018 Dec 5];17(9):983–93. Available from:  
810 <https://academic.oup.com/glycob/article-lookup/doi/10.1093/glycob/cwm062>
- 811 75. Rudd T, Skidmore M, Guimond S, Holman J, Turnbull J. The potential for circular dichroism as an  
812 additional facile and sensitive method of monitoring low-molecular-weight heparins and heparinoids.  
813 *Thromb Haemost.* 2009;102.
- 814 76. Uniewicz K a, Ori A, Xu R, Ahmed Y, Fernig DG, Yates E a. Differential Scanning Fluorimetry  
815 measurement of protein stability changes upon binding to glycosaminoglycans : a rapid screening test for  
816 binding specificity Figure S-1 Sequence data for tested FGF-s Figure S-2 Sulfation pattern of the major  
817 repeating di. 2010;82(9):1–3.
- 818 77. Niesen FH, Berglund H, Vedadi M. The use of differential scanning fluorimetry to detect ligand interactions  
819 that promote protein stability. *Nat Protoc* [Internet]. 2007 Sep 1 [cited 2019 Apr 18];2(9):2212–21.  
820 Available from: <http://www.ncbi.nlm.nih.gov/pubmed/17853878>  
821  
822

823 **Supplementary Materials**

824

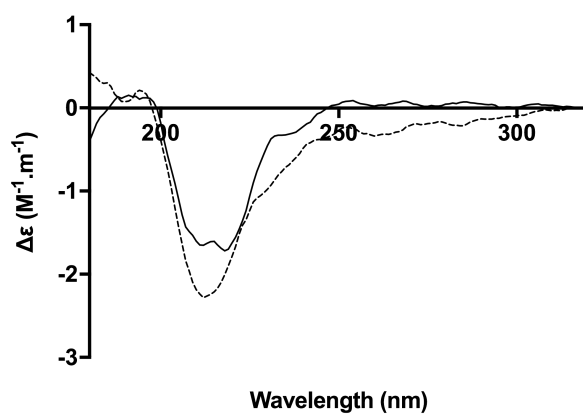

825

826 **Supplementary 1:** The CD structural change of BACE1 (solid) observed in the presence of *P. pelagicus* F5  
827 (dashed) with a ratio of 2:1 w/w, B:F5.
